# Supplementary material for: Bacopa monnieri and Their Bioactive Compounds Inferred Multi-Target Treatment Strategy for Neurological Diseases: A Cheminformatics and System Pharmacology Approach
Source: MDPI journal article supplement (doi:10.3390/biom10040536), 2020-04-02
Supplement: s1 [file s1]

# SwissTargetPrediction report:

## Reference:

Gfeller D., Michielin O. & Zoete V.  
Shaping the interaction landscape of  
bioactive molecules, *Bioinformatics*  
(2013) 29:3073-3079.

## Query Molecule

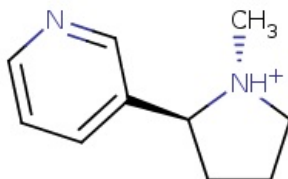

## Frequency of Target Class

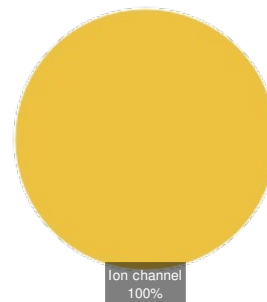

| Target                                                        | Uniprot ID                  | Gene code                   | ChEMBL ID     | Probability            | # sim. cmpds (3D / 2D) | Target Class |
|---------------------------------------------------------------|-----------------------------|-----------------------------|---------------|------------------------|------------------------|--------------|
| Complex                                                       | P11230/Q07001/P02708/P07510 | CHRNA1/CHRNA2/CHRNA3/CHRNA4 | CHEMBL1907588 | <div><div></div></div> | 3 / 1                  | Ion channel  |
| Complex                                                       | P17787/P43681               | CHRNA2/CHRNA4               | CHEMBL1907589 | <div><div></div></div> | 53 / 96                | Ion channel  |
| Complex                                                       | P30926/P32297               | CHRNA4/CHRNA3               | CHEMBL1907594 | <div><div></div></div> | 14 / 26                | Ion channel  |
| Complex                                                       | P30926/P43681               | CHRNA4/CHRNA4               | CHEMBL1907591 | <div><div></div></div> | 2 / 4                  | Ion channel  |
| Complex                                                       | P30926/Q15822               | CHRNA4/CHRNA2               | CHEMBL2109230 | <div><div></div></div> | 2 / 4                  | Ion channel  |
| Neuronal acetylcholine receptor subunit alpha-3               | P32297                      | CHRNA3                      | CHEMBL3068    | <div><div></div></div> | 11 / 2                 | Ion channel  |
| Complex                                                       | P32297/P17787               | CHRNA3/CHRNA2               | CHEMBL2109234 | <div><div></div></div> | 4 / 4                  | Ion channel  |
| Neuronal acetylcholine receptor subunit alpha-7               | P36544                      | CHRNA7                      | CHEMBL2492    | <div><div></div></div> | 70 / 125               | Ion channel  |
| Neuronal acetylcholine receptor subunit alpha-4 (by homology) | P43681                      | CHRNA4                      | CHEMBL1882    | <div><div></div></div> | 14 / 6                 | Ion channel  |
| Complex                                                       | Q15822/P17787               | CHRNA2/CHRNA2               | CHEMBL2109236 | <div><div></div></div> | 1 / 1                  | Ion channel  |
| CHRNA7-FAM7A fusion protein (by homology)                     | Q494W8                      | CHRFAM7A                    |               | <div><div></div></div> | 70 / 125               | Ion channel  |
| Neuronal acetylcholine receptor subunit alpha-2 (by homology) | Q15822                      | CHRNA2                      | CHEMBL1794    | <div><div></div></div> | 14 / 6                 | Ion channel  |

|                                                                         |        |         |            |                                                                                     |        |             |
|-------------------------------------------------------------------------|--------|---------|------------|-------------------------------------------------------------------------------------|--------|-------------|
| Neuronal acetylcholine receptor subunit beta-2 ( <i>by homology</i> )   | P17787 | CHRNA2  | CHEMBL1883 |  | 4 / 2  | ion channel |
| Neuronal acetylcholine receptor subunit beta-4 ( <i>by homology</i> )   | P30926 | CHRNA4  | CHEMBL3002 |  | 4 / 2  | ion channel |
| Neuronal acetylcholine receptor subunit alpha-10 ( <i>by homology</i> ) | Q9GZZ6 | CHRNA10 | CHEMBL2551 |  | 18 / 1 | ion channel |

# SwissTargetPrediction report:

## Reference:

Gfeller D., Michielin O. & Zoete V.  
 Shaping the interaction landscape of  
 bioactive molecules, *Bioinformatics*  
 (2013) 29:3073-3079.

## Query Molecule

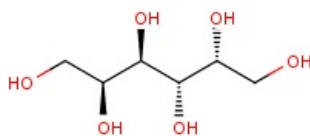

## Frequency of Target Class

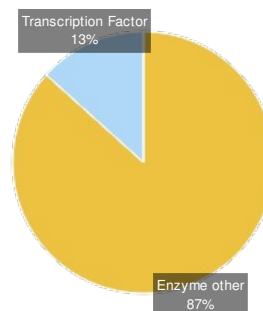

| Target                                             | Uniprot ID | Gene code | ChEMBL ID     | Probability            | # sim. cmpds (3D / 2D) | Target Class         |
|----------------------------------------------------|------------|-----------|---------------|------------------------|------------------------|----------------------|
| Tyrosyl-DNA phosphodiesterase 1                    | Q9NUW8     | TDP1      | CHEMBL1075138 | <div><div></div></div> | 2 / 5                  | Enzyme               |
| Glucosylceramidase                                 | P04062     | GBA       | CHEMBL2179    | <div><div></div></div> | 2 / 2                  | Enzyme               |
| Carbonic anhydrase 1                               | P00915     | CA1       | CHEMBL261     | <div><div></div></div> | 3 / 2                  | Enzyme               |
| Carbonic anhydrase 2                               | P00918     | CA2       | CHEMBL205     | <div><div></div></div> | 3 / 2                  | Enzyme               |
| Carbonic anhydrase 3 (by homology)                 | P07451     | CA3       | CHEMBL2885    | <div><div></div></div> | 3 / 2                  | Enzyme               |
| Carbonic anhydrase 5A, mitochondrial (by homology) | P35218     | CA5A      | CHEMBL4789    | <div><div></div></div> | 3 / 2                  | Enzyme               |
| Carbonic anhydrase 7 (by homology)                 | P43166     | CA7       | CHEMBL2326    | <div><div></div></div> | 3 / 2                  | Enzyme               |
| Carbonic anhydrase 13 (by homology)                | Q8N1Q1     | CA13      | CHEMBL3912    | <div><div></div></div> | 3 / 2                  | Enzyme               |
| Carbonic anhydrase 5B, mitochondrial (by homology) | Q9Y2D0     | CA5B      | CHEMBL3969    | <div><div></div></div> | 3 / 2                  | Enzyme               |
| Tissue alpha-L-fucosidase                          | P04066     | FUCA1     | CHEMBL4176    | <div><div></div></div> | 4 / 5                  | Enzyme               |
| Plasma alpha-L-fucosidase (by homology)            | Q9BTY2     | FUCA2     | CHEMBL2271    | <div><div></div></div> | 4 / 5                  | Enzyme               |
| Oxysterols receptor LXR-beta                       | P55055     | NR1H2     | CHEMBL4093    | <div><div></div></div> | 0 / 2                  | Transcription Factor |
| Oxysterols receptor LXR-alpha                      | Q13133     | NR1H3     | CHEMBL2808    | <div><div></div></div> | 0 / 2                  | Transcription Factor |
| Glucoamylase                                       | O43451     | MGAM      | CHEMBL2074    | <div><div></div></div> | 2 / 3                  | Enzyme               |
| Sucrase                                            | P14410     | SI        | CHEMBL2748    | <div><div></div></div> | 2 / 3                  | Enzyme               |

# SwissTargetPrediction report:

## Reference:

Gfeller D., Michielin O. & Zoete V.  
 Shaping the interaction landscape of  
 bioactive molecules, *Bioinformatics*  
 (2013) 29:3073-3079.

## Query Molecule

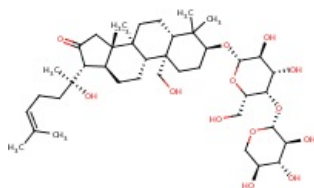

## Frequency of Target Class

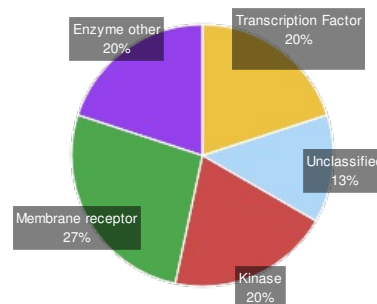

| Target                                                                      | Uniprot ID | Gene code | ChEMBL ID     | Probability            | # sim. cmpds (3D / 2D) | Target Class         |
|-----------------------------------------------------------------------------|------------|-----------|---------------|------------------------|------------------------|----------------------|
| Signal transducer and activator of transcription 3                          | P40763     | STAT3     | CHEMBL4026    | <div><div></div></div> | 1 / 4                  | Transcription Factor |
| Signal transducer and activator of transcription 1-alpha/beta (by homology) | P42224     | STAT1     | CHEMBL6101    | <div><div></div></div> | 1 / 4                  | Unclassified         |
| Signal transducer and activator of transcription 2 (by homology)            | P52630     | STAT2     |               | <div><div></div></div> | 1 / 4                  | Transcription Factor |
| Signal transducer and activator of transcription 4 (by homology)            | Q14765     | STAT4     |               | <div><div></div></div> | 1 / 4                  | Transcription Factor |
| Microtubule-associated protein tau                                          | P10636     | MAPT      | CHEMBL1293224 | <div><div></div></div> | 1 / 19                 | Unclassified         |
| Vascular endothelial growth factor receptor 1 (by homology)                 | P17948     | FLT1      | CHEMBL1868    | <div><div></div></div> | 5 / 1                  | Tyr Kinase           |
| Vascular endothelial growth factor receptor 2                               | P35968     | KDR       | CHEMBL279     | <div><div></div></div> | 5 / 1                  | Tyr Kinase           |
| Vascular endothelial growth factor receptor 3 (by homology)                 | P35916     | FLT4      | CHEMBL1955    | <div><div></div></div> | 5 / 1                  | Tyr Kinase           |
| Alpha-2A adrenergic receptor                                                | P08913     | ADRA2A    | CHEMBL1867    | <div><div></div></div> | 2 / 2                  | Membrane receptor    |
| Alpha-2B adrenergic receptor                                                | P18089     | ADRA2B    | CHEMBL1942    | <div><div></div></div> | 2 / 2                  | Membrane receptor    |
| Alpha-2C adrenergic receptor                                                | P18825     | ADRA2C    | CHEMBL1916    | <div><div></div></div> | 2 / 2                  | Membrane receptor    |
| Cytochrome P450 2D6                                                         | P10635     | CYP2D6    | CHEMBL289     | <div><div></div></div> | 1 / 1                  | Enzyme               |
| Cytochrome P450 2J2                                                         | P51589     | CYP2J2    | CHEMBL3491    | <div><div></div></div> | 1 / 1                  | Enzyme               |
| Platelet-activating factor receptor                                         | P25105     | PTAFR     | CHEMBL250     | <div><div></div></div> | 1 / 39                 | Membrane receptor    |
| Corticosteroid 11-beta-dehydrogenase isozyme 1                              | P28845     | HSD11B1   | CHEMBL4235    | <div><div></div></div> | 0 / 4                  | Enzyme               |



# SwissTargetPrediction report:

## Reference:

Gfeller D., Michielin O. & Zoete V.  
 Shaping the interaction landscape of  
 bioactive molecules, *Bioinformatics*  
 (2013) 29:3073-3079.

## Query Molecule

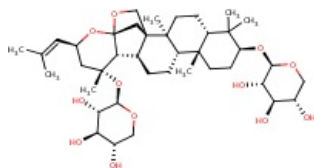

## Frequency of Target Class

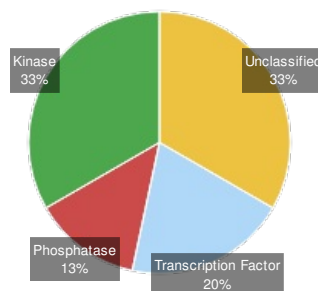

| Target                                                                               | Uniprot ID | Gene code | ChEMBL ID     | Probability            | # sim. cmpds (3D / 2D) | Target Class         |
|--------------------------------------------------------------------------------------|------------|-----------|---------------|------------------------|------------------------|----------------------|
| Muscleblind-like protein 1                                                           | Q9NR56     | MBNL1     | CHEMBL1293317 | <div><div></div></div> | 1 / 2                  | Unclassified         |
| Muscleblind-like protein 2 ( <i>by homology</i> )                                    | Q5VZF2     | MBNL2     |               | <div><div></div></div> | 1 / 2                  | Unclassified         |
| Muscleblind-like protein 3 ( <i>by homology</i> )                                    | Q9NUK0     | MBNL3     |               | <div><div></div></div> | 1 / 2                  | Unclassified         |
| Signal transducer and activator of transcription 3                                   | P40763     | STAT3     | CHEMBL4026    | <div><div></div></div> | 0 / 4                  | Transcription Factor |
| Signal transducer and activator of transcription 1-alpha/beta ( <i>by homology</i> ) | P42224     | STAT1     | CHEMBL6101    | <div><div></div></div> | 0 / 4                  | Unclassified         |
| Signal transducer and activator of transcription 2 ( <i>by homology</i> )            | P52630     | STAT2     |               | <div><div></div></div> | 0 / 4                  | Transcription Factor |
| Signal transducer and activator of transcription 4 ( <i>by homology</i> )            | Q14765     | STAT4     |               | <div><div></div></div> | 0 / 4                  | Transcription Factor |
| Tyrosine-protein phosphatase non-receptor type 2                                     | P17706     | PTPN2     | CHEMBL3807    | <div><div></div></div> | 1 / 7                  | Tyr Phosphatase      |
| Tyrosine-protein phosphatase non-receptor type 1                                     | P18031     | PTPN1     | CHEMBL335     | <div><div></div></div> | 1 / 7                  | Tyr Phosphatase      |
| Microtubule-associated protein tau                                                   | P10636     | MAPT      | CHEMBL1293224 | <div><div></div></div> | 0 / 12                 | Unclassified         |
| Protein kinase C gamma type ( <i>by homology</i> )                                   | P05129     | PRKCG     | CHEMBL2938    | <div><div></div></div> | 1 / 123                | Ser_Thr Kinase       |
| Protein kinase C beta type ( <i>by homology</i> )                                    | P05771     | PRKCB     | CHEMBL3045    | <div><div></div></div> | 1 / 123                | Ser_Thr Kinase       |
| Protein kinase C alpha type                                                          | P17252     | PRKCA     | CHEMBL299     | <div><div></div></div> | 1 / 123                | Ser_Thr Kinase       |
| Protein kinase C theta type ( <i>by homology</i> )                                   | Q04759     | PRKCQ     | CHEMBL3920    | <div><div></div></div> | 1 / 126                | Ser_Thr Kinase       |
| Protein kinase C delta type regulatory subunit ( <i>by homology</i> )                | Q05655     | PRKCD     | CHEMBL2996    | <div><div></div></div> | 1 / 126                | Ser_Thr Kinase       |

# SwissTargetPrediction report:

## Reference:

Gfeller D., Michielin O. & Zoete V.  
Shaping the interaction landscape of  
bioactive molecules, *Bioinformatics*  
(2013) 29:3073-3079.

## Query Molecule

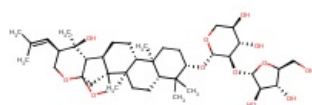

## Frequency of Target Class

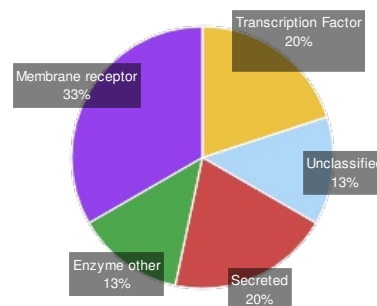

| Target                                                                               | Uniprot ID | Gene code | ChEMBL ID     | Probability            | # sim. cmpds (3D / 2D) | Target Class         |
|--------------------------------------------------------------------------------------|------------|-----------|---------------|------------------------|------------------------|----------------------|
| Signal transducer and activator of transcription 3                                   | P40763     | STAT3     | CHEMBL4026    | <div><div></div></div> | 0 / 4                  | Transcription Factor |
| Signal transducer and activator of transcription 1-alpha/beta ( <i>by homology</i> ) | P42224     | STAT1     | CHEMBL6101    | <div><div></div></div> | 0 / 4                  | Unclassified         |
| Signal transducer and activator of transcription 2 ( <i>by homology</i> )            | P52630     | STAT2     |               | <div><div></div></div> | 0 / 4                  | Transcription Factor |
| Signal transducer and activator of transcription 4 ( <i>by homology</i> )            | Q14765     | STAT4     |               | <div><div></div></div> | 0 / 4                  | Transcription Factor |
| Fibroblast growth factor 1                                                           | P05230     | FGF1      | CHEMBL2120    | <div><div></div></div> | 0 / 7                  | Secreted             |
| Fibroblast growth factor 2                                                           | P09038     | FGF2      | CHEMBL3107    | <div><div></div></div> | 0 / 7                  | Secreted             |
| Vascular endothelial growth factor A                                                 | P15692     | VEGFA     | CHEMBL1783    | <div><div></div></div> | 0 / 2                  | Secreted             |
| Heparanase 8 kDa subunit                                                             | Q9Y251     | HPSE      | CHEMBL3921    | <div><div></div></div> | 0 / 4                  | Enzyme               |
| Inactive heparanase-2 ( <i>by homology</i> )                                         | Q8WWQ2     | HPSE2     |               | <div><div></div></div> | 0 / 4                  | Enzyme               |
| Muscarinic acetylcholine receptor M5 ( <i>by homology</i> )                          | P08912     | CHRM5     | CHEMBL2035    | <div><div></div></div> | 0 / 2                  | Membrane receptor    |
| Muscarinic acetylcholine receptor M1                                                 | P11229     | CHRM1     | CHEMBL216     | <div><div></div></div> | 0 / 2                  | Membrane receptor    |
| Muscarinic acetylcholine receptor M3 ( <i>by homology</i> )                          | P20309     | CHRM3     | CHEMBL245     | <div><div></div></div> | 0 / 2                  | Membrane receptor    |
| Muscarinic acetylcholine receptor M2 ( <i>by homology</i> )                          | P08172     | CHRM2     | CHEMBL211     | <div><div></div></div> | 0 / 2                  | Membrane receptor    |
| Muscarinic acetylcholine receptor M4 ( <i>by homology</i> )                          | P08173     | CHRM4     | CHEMBL1821    | <div><div></div></div> | 0 / 2                  | Membrane receptor    |
| Muscleblind-like protein 1                                                           | Q9NR56     | MBNL1     | CHEMBL1293317 | <div><div></div></div> | 0 / 3                  | Unclassified         |

# SwissTargetPrediction report:

## Reference:

Gfeller D., Michielin O. & Zoete V.  
Shaping the interaction landscape of  
bioactive molecules, *Bioinformatics*  
(2013) 29:3073-3079.

## Query Molecule

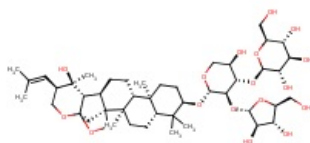

## Frequency of Target Class

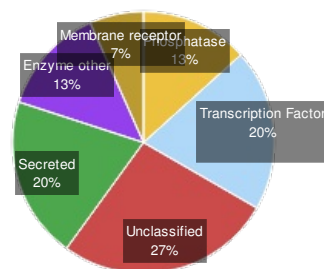

| Target                                                                               | Uniprot ID | Gene code | ChEMBL ID     | Probability            | # sim. cmpds (3D / 2D) | Target Class         |
|--------------------------------------------------------------------------------------|------------|-----------|---------------|------------------------|------------------------|----------------------|
| Tyrosine-protein phosphatase non-receptor type 2 ( <i>by homology</i> )              | P17706     | PTPN2     | CHEMBL3807    | <div><div></div></div> | 6 / 2                  | Tyr Phosphatase      |
| Tyrosine-protein phosphatase non-receptor type 1                                     | P18031     | PTPN1     | CHEMBL335     | <div><div></div></div> | 6 / 2                  | Tyr Phosphatase      |
| Signal transducer and activator of transcription 3                                   | P40763     | STAT3     | CHEMBL4026    | <div><div></div></div> | 0 / 4                  | Transcription Factor |
| Signal transducer and activator of transcription 1-alpha/beta ( <i>by homology</i> ) | P42224     | STAT1     | CHEMBL6101    | <div><div></div></div> | 0 / 4                  | Unclassified         |
| Signal transducer and activator of transcription 2 ( <i>by homology</i> )            | P52630     | STAT2     |               | <div><div></div></div> | 0 / 4                  | Transcription Factor |
| Signal transducer and activator of transcription 4 ( <i>by homology</i> )            | Q14765     | STAT4     |               | <div><div></div></div> | 0 / 4                  | Transcription Factor |
| Fibroblast growth factor 1                                                           | P05230     | FGF1      | CHEMBL2120    | <div><div></div></div> | 0 / 8                  | Secreted             |
| Fibroblast growth factor 2                                                           | P09038     | FGF2      | CHEMBL3107    | <div><div></div></div> | 0 / 8                  | Secreted             |
| Vascular endothelial growth factor A                                                 | P15692     | VEGFA     | CHEMBL1783    | <div><div></div></div> | 0 / 2                  | Secreted             |
| Heparanase 8 kDa subunit                                                             | Q9Y251     | HPSE      | CHEMBL3921    | <div><div></div></div> | 0 / 4                  | Enzyme               |
| Inactive heparanase-2 ( <i>by homology</i> )                                         | Q8WWQ2     | HPSE2     |               | <div><div></div></div> | 0 / 4                  | Enzyme               |
| Muscleblind-like protein 1                                                           | Q9NR56     | MBNL1     | CHEMBL1293317 | <div><div></div></div> | 0 / 3                  | Unclassified         |
| Muscleblind-like protein 2 ( <i>by homology</i> )                                    | Q5VZF2     | MBNL2     |               | <div><div></div></div> | 0 / 3                  | Unclassified         |
| Muscleblind-like protein 3 ( <i>by homology</i> )                                    | Q9NUK0     | MBNL3     |               | <div><div></div></div> | 0 / 3                  | Unclassified         |
| Muscarinic acetylcholine receptor M5 ( <i>by homology</i> )                          | P08912     | CHRM5     | CHEMBL2035    | <div><div></div></div> | 0 / 2                  | Membrane receptor    |

# SwissTargetPrediction report:

## Reference:

Gfeller D., Michielin O. & Zoete V.  
 Shaping the interaction landscape of  
 bioactive molecules, *Bioinformatics*  
 (2013) 29:3073-3079.

## Query Molecule

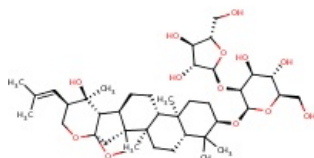

## Frequency of Target Class

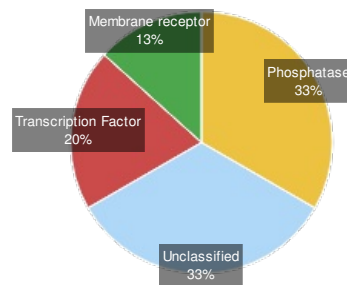

| Target                                                                                 | Uniprot ID | Gene code | ChEMBL ID     | Probability            | # sim. cmpds (3D / 2D) | Target Class         |
|----------------------------------------------------------------------------------------|------------|-----------|---------------|------------------------|------------------------|----------------------|
| Tyrosine-protein phosphatase non-receptor type 1                                       | P18031     | PTPN1     | CHEMBL335     | <div><div></div></div> | 4 / 2                  | Tyr Phosphatase      |
| Tyrosine-protein phosphatase non-receptor type 2 ( <i>by homology</i> )                | P17706     | PTPN2     | CHEMBL3807    | <div><div></div></div> | 4 / 2                  | Tyr Phosphatase      |
| Muscleblind-like protein 1                                                             | Q9NR56     | MBNL1     | CHEMBL1293317 | <div><div></div></div> | 1 / 3                  | Unclassified         |
| Muscleblind-like protein 2 ( <i>by homology</i> )                                      | Q5VZF2     | MBNL2     |               | <div><div></div></div> | 1 / 3                  | Unclassified         |
| Muscleblind-like protein 3 ( <i>by homology</i> )                                      | Q9NUK0     | MBNL3     |               | <div><div></div></div> | 1 / 3                  | Unclassified         |
| Microtubule-associated protein tau                                                     | P10636     | MAPT      | CHEMBL1293224 | <div><div></div></div> | 1 / 10                 | Unclassified         |
| Serine/threonine-protein phosphatase PP1-gamma catalytic subunit                       | P36873     | PPP1CC    | CHEMBL4438    | <div><div></div></div> | 1 / 2                  | Ser_Thr Phosphatase  |
| Serine/threonine-protein phosphatase PP1-alpha catalytic subunit                       | P62136     | PPP1CA    | CHEMBL2164    | <div><div></div></div> | 1 / 2                  | Ser_Thr Phosphatase  |
| Serine/threonine-protein phosphatase PP1-beta catalytic subunit ( <i>by homology</i> ) | P62140     | PPP1CB    | CHEMBL4546    | <div><div></div></div> | 1 / 2                  | Ser_Thr Phosphatase  |
| Signal transducer and activator of transcription 3                                     | P40763     | STAT3     | CHEMBL4026    | <div><div></div></div> | 0 / 4                  | Transcription Factor |
| Signal transducer and activator of transcription 1-alpha/beta ( <i>by homology</i> )   | P42224     | STAT1     | CHEMBL6101    | <div><div></div></div> | 0 / 4                  | Unclassified         |
| Signal transducer and activator of transcription 2 ( <i>by homology</i> )              | P52630     | STAT2     |               | <div><div></div></div> | 0 / 4                  | Transcription Factor |
| Signal transducer and activator of transcription 4 ( <i>by homology</i> )              | Q14765     | STAT4     |               | <div><div></div></div> | 0 / 4                  | Transcription Factor |
| D(2) dopamine receptor                                                                 | P14416     | DRD2      | CHEMBL217     | <div><div></div></div> | 4 / 2                  | Membrane receptor    |
| 5-hydroxytryptamine receptor 2A                                                        | P28223     | HTR2A     | CHEMBL224     | <div><div></div></div> | 1 / 1                  | Membrane receptor    |

# SwissTargetPrediction report:

## Reference:

Gfeller D., Michielin O. & Zoete V.  
 Shaping the interaction landscape of  
 bioactive molecules, *Bioinformatics*  
 (2013) 29:3073-3079.

## Query Molecule

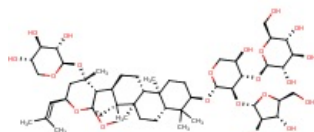

## Frequency of Target Class

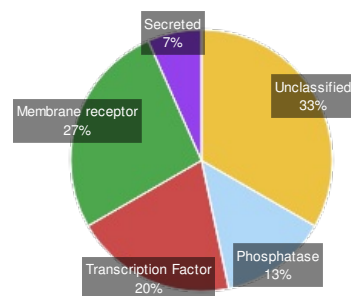

| Target                                                                               | Uniprot ID | Gene code | ChEMBL ID     | Probability            | # sim. cmpds (3D / 2D) | Target Class         |
|--------------------------------------------------------------------------------------|------------|-----------|---------------|------------------------|------------------------|----------------------|
| Muscleblind-like protein 1                                                           | Q9NR56     | MBNL1     | CHEMBL1293317 | <div><div></div></div> | 0 / 2                  | Unclassified         |
| Muscleblind-like protein 2 ( <i>by homology</i> )                                    | Q5VZF2     | MBNL2     |               | <div><div></div></div> | 0 / 2                  | Unclassified         |
| Muscleblind-like protein 3 ( <i>by homology</i> )                                    | Q9NUK0     | MBNL3     |               | <div><div></div></div> | 0 / 2                  | Unclassified         |
| Tyrosine-protein phosphatase non-receptor type 1                                     | P18031     | PTPN1     | CHEMBL335     | <div><div></div></div> | 2 / 6                  | Tyr Phosphatase      |
| Tyrosine-protein phosphatase non-receptor type 2 ( <i>by homology</i> )              | P17706     | PTPN2     | CHEMBL3807    | <div><div></div></div> | 2 / 6                  | Tyr Phosphatase      |
| Signal transducer and activator of transcription 3                                   | P40763     | STAT3     | CHEMBL4026    | <div><div></div></div> | 0 / 4                  | Transcription Factor |
| Signal transducer and activator of transcription 1-alpha/beta ( <i>by homology</i> ) | P42224     | STAT1     | CHEMBL6101    | <div><div></div></div> | 0 / 4                  | Unclassified         |
| Signal transducer and activator of transcription 2 ( <i>by homology</i> )            | P52630     | STAT2     |               | <div><div></div></div> | 0 / 4                  | Transcription Factor |
| Signal transducer and activator of transcription 4 ( <i>by homology</i> )            | Q14765     | STAT4     |               | <div><div></div></div> | 0 / 4                  | Transcription Factor |
| Microtubule-associated protein tau                                                   | P10636     | MAPT      | CHEMBL1293224 | <div><div></div></div> | 0 / 12                 | Unclassified         |
| Mu-type opioid receptor                                                              | P35372     | OPRM1     | CHEMBL233     | <div><div></div></div> | 1 / 6                  | Membrane receptor    |
| Delta-type opioid receptor                                                           | P41143     | OPRD1     | CHEMBL236     | <div><div></div></div> | 1 / 6                  | Membrane receptor    |
| Kappa-type opioid receptor                                                           | P41145     | OPRK1     | CHEMBL237     | <div><div></div></div> | 1 / 6                  | Membrane receptor    |
| Nociceptin receptor ( <i>by homology</i> )                                           | P41146     | OPRL1     | CHEMBL2014    | <div><div></div></div> | 1 / 6                  | Membrane receptor    |
| Fibroblast growth factor 1                                                           | P05230     | FGF1      | CHEMBL2120    | <div><div></div></div> | 0 / 6                  | Secreted             |

# SwissTargetPrediction report:

## Reference:

Gfeller D., Michielin O. & Zoete V.  
 Shaping the interaction landscape of  
 bioactive molecules, *Bioinformatics*  
 (2013) 29:3073-3079.

## Query Molecule

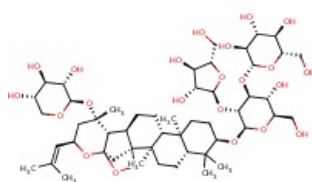

## Frequency of Target Class

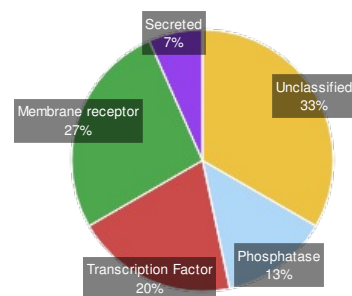

| Target                                                                               | Uniprot ID | Gene code | ChEMBL ID     | Probability            | # sim. cmpds (3D / 2D) | Target Class         |
|--------------------------------------------------------------------------------------|------------|-----------|---------------|------------------------|------------------------|----------------------|
| Muscleblind-like protein 1                                                           | Q9NR56     | MBNL1     | CHEMBL1293317 | <div><div></div></div> | 0 / 2                  | Unclassified         |
| Muscleblind-like protein 2 ( <i>by homology</i> )                                    | Q5VZF2     | MBNL2     |               | <div><div></div></div> | 0 / 2                  | Unclassified         |
| Muscleblind-like protein 3 ( <i>by homology</i> )                                    | Q9NUK0     | MBNL3     |               | <div><div></div></div> | 0 / 2                  | Unclassified         |
| Tyrosine-protein phosphatase non-receptor type 1                                     | P18031     | PTPN1     | CHEMBL335     | <div><div></div></div> | 2 / 6                  | Tyr Phosphatase      |
| Tyrosine-protein phosphatase non-receptor type 2 ( <i>by homology</i> )              | P17706     | PTPN2     | CHEMBL3807    | <div><div></div></div> | 2 / 6                  | Tyr Phosphatase      |
| Signal transducer and activator of transcription 3                                   | P40763     | STAT3     | CHEMBL4026    | <div><div></div></div> | 0 / 4                  | Transcription Factor |
| Signal transducer and activator of transcription 1-alpha/beta ( <i>by homology</i> ) | P42224     | STAT1     | CHEMBL6101    | <div><div></div></div> | 0 / 4                  | Unclassified         |
| Signal transducer and activator of transcription 2 ( <i>by homology</i> )            | P52630     | STAT2     |               | <div><div></div></div> | 0 / 4                  | Transcription Factor |
| Signal transducer and activator of transcription 4 ( <i>by homology</i> )            | Q14765     | STAT4     |               | <div><div></div></div> | 0 / 4                  | Transcription Factor |
| Microtubule-associated protein tau                                                   | P10636     | MAPT      | CHEMBL1293224 | <div><div></div></div> | 0 / 12                 | Unclassified         |
| Mu-type opioid receptor                                                              | P35372     | OPRM1     | CHEMBL233     | <div><div></div></div> | 1 / 6                  | Membrane receptor    |
| Delta-type opioid receptor                                                           | P41143     | OPRD1     | CHEMBL236     | <div><div></div></div> | 1 / 6                  | Membrane receptor    |
| Kappa-type opioid receptor                                                           | P41145     | OPRK1     | CHEMBL237     | <div><div></div></div> | 1 / 6                  | Membrane receptor    |
| Nociceptin receptor ( <i>by homology</i> )                                           | P41146     | OPRL1     | CHEMBL2014    | <div><div></div></div> | 1 / 6                  | Membrane receptor    |
| Fibroblast growth factor 1                                                           | P05230     | FGF1      | CHEMBL2120    | <div><div></div></div> | 0 / 6                  | Secreted             |

# SwissTargetPrediction report:

## Reference:

Gfeller D., Michielin O. & Zoete V.  
 Shaping the interaction landscape of  
 bioactive molecules, *Bioinformatics*  
 (2013) 29:3073-3079.

## Query Molecule

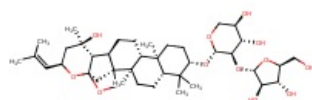

## Frequency of Target Class

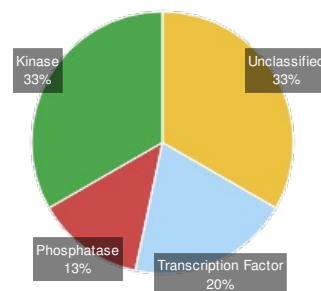

| Target                                                                      | Uniprot ID | Gene code | ChEMBL ID     | Probability            | # sim. cmpds (3D / 2D) | Target Class         |
|-----------------------------------------------------------------------------|------------|-----------|---------------|------------------------|------------------------|----------------------|
| Microtubule-associated protein tau                                          | P10636     | MAPT      | CHEMBL1293224 | <div><div></div></div> | 1 / 12                 | Unclassified         |
| Signal transducer and activator of transcription 3                          | P40763     | STAT3     | CHEMBL4026    | <div><div></div></div> | 2 / 4                  | Transcription Factor |
| Signal transducer and activator of transcription 1-alpha/beta (by homology) | P42224     | STAT1     | CHEMBL6101    | <div><div></div></div> | 2 / 4                  | Unclassified         |
| Signal transducer and activator of transcription 2 (by homology)            | P52630     | STAT2     |               | <div><div></div></div> | 2 / 4                  | Transcription Factor |
| Signal transducer and activator of transcription 4 (by homology)            | Q14765     | STAT4     |               | <div><div></div></div> | 2 / 4                  | Transcription Factor |
| Muscleblind-like protein 1                                                  | Q9NR56     | MBNL1     | CHEMBL1293317 | <div><div></div></div> | 0 / 2                  | Unclassified         |
| Muscleblind-like protein 2 (by homology)                                    | Q5VZF2     | MBNL2     |               | <div><div></div></div> | 0 / 2                  | Unclassified         |
| Muscleblind-like protein 3 (by homology)                                    | Q9NUK0     | MBNL3     |               | <div><div></div></div> | 0 / 2                  | Unclassified         |
| Tyrosine-protein phosphatase non-receptor type 1                            | P18031     | PTPN1     | CHEMBL335     | <div><div></div></div> | 1 / 6                  | Tyr Phosphatase      |
| Tyrosine-protein phosphatase non-receptor type 2 (by homology)              | P17706     | PTPN2     | CHEMBL3807    | <div><div></div></div> | 1 / 6                  | Tyr Phosphatase      |
| Vascular endothelial growth factor receptor 1                               | P17948     | FLT1      | CHEMBL1868    | <div><div></div></div> | 1 / 1                  | Tyr Kinase           |
| Vascular endothelial growth factor receptor 2                               | P35968     | KDR       | CHEMBL279     | <div><div></div></div> | 1 / 1                  | Tyr Kinase           |
| Vascular endothelial growth factor receptor 3 (by homology)                 | P35916     | FLT4      | CHEMBL1955    | <div><div></div></div> | 1 / 1                  | Tyr Kinase           |
| Protein kinase C gamma type (by homology)                                   | P05129     | PRKCG     | CHEMBL2938    | <div><div></div></div> | 1 / 137                | Ser_Thr Kinase       |
| Protein kinase C beta type                                                  | P05771     | PRKCB     | CHEMBL3045    | <div><div></div></div> | 1 / 137                | Ser_Thr Kinase       |

# SwissTargetPrediction report:

## Reference:

Gfeller D., Michielin O. & Zoete V.  
Shaping the interaction landscape of  
bioactive molecules, *Bioinformatics*  
(2013) 29:3073-3079.

## Query Molecule

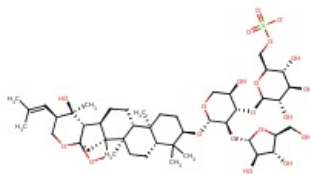

## Frequency of Target Class

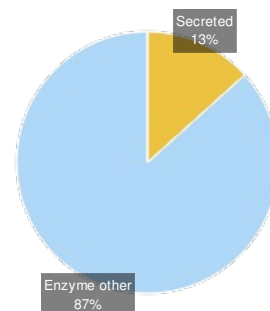

| Target                                                      | Uniprot ID | Gene code | ChEMBL ID  | Probability            | # sim. cmpds (3D / 2D) | Target Class |
|-------------------------------------------------------------|------------|-----------|------------|------------------------|------------------------|--------------|
| Fibroblast growth factor 1                                  | P05230     | FGF1      | CHEMBL2120 | <div><div></div></div> | 0 / 13                 | Secreted     |
| Fibroblast growth factor 2                                  | P09038     | FGF2      | CHEMBL3107 | <div><div></div></div> | 0 / 13                 | Secreted     |
| Heparanase 8 kDa subunit                                    | Q9Y251     | HPSE      | CHEMBL3921 | <div><div></div></div> | 0 / 7                  | Enzyme       |
| Inactive heparanase-2 ( <i>by homology</i> )                | Q8WWQ2     | HPSE2     |            | <div><div></div></div> | 0 / 7                  | Enzyme       |
| Carbonic anhydrase 1                                        | P00915     | CA1       | CHEMBL261  | <div><div></div></div> | 2 / 21                 | Enzyme       |
| Carbonic anhydrase 2                                        | P00918     | CA2       | CHEMBL205  | <div><div></div></div> | 2 / 21                 | Enzyme       |
| Carbonic anhydrase 5A, mitochondrial ( <i>by homology</i> ) | P35218     | CA5A      | CHEMBL4789 | <div><div></div></div> | 2 / 21                 | Enzyme       |
| Carbonic anhydrase 7 ( <i>by homology</i> )                 | P43166     | CA7       | CHEMBL2326 | <div><div></div></div> | 2 / 21                 | Enzyme       |
| Carbonic anhydrase 13 ( <i>by homology</i> )                | Q8N1Q1     | CA13      | CHEMBL3912 | <div><div></div></div> | 2 / 21                 | Enzyme       |
| Carbonic anhydrase 5B, mitochondrial ( <i>by homology</i> ) | Q9Y2D0     | CA5B      | CHEMBL3969 | <div><div></div></div> | 2 / 21                 | Enzyme       |
| Carbonic anhydrase 3 ( <i>by homology</i> )                 | P07451     | CA3       | CHEMBL2885 | <div><div></div></div> | 2 / 21                 | Enzyme       |
| Carbonic anhydrase 4                                        | P22748     | CA4       | CHEMBL3729 | <div><div></div></div> | 2 / 1                  | Enzyme       |
| Carbonic anhydrase 12                                       | O43570     | CA12      | CHEMBL3242 | <div><div></div></div> | 0 / 13                 | Enzyme       |
| Carbonic anhydrase 9                                        | Q16790     | CA9       | CHEMBL3594 | <div><div></div></div> | 0 / 15                 | Enzyme       |
| Carbonic anhydrase 14 ( <i>by homology</i> )                | Q9ULX7     | CA14      | CHEMBL3510 | <div><div></div></div> | 0 / 13                 | Enzyme       |



# SwissTargetPrediction report:

## Reference:

Gfeller D., Michielin O. & Zoete V.  
Shaping the interaction landscape of  
bioactive molecules, *Bioinformatics*  
(2013) 29:3073-3079.

## Query Molecule

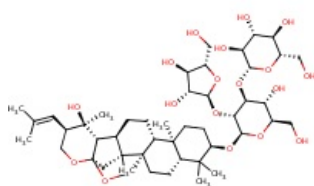

## Frequency of Target Class



| Target                                                                               | Uniprot ID | Gene code | ChEMBL ID     | Probability            | # sim. cmpds (3D / 2D) | Target Class         |
|--------------------------------------------------------------------------------------|------------|-----------|---------------|------------------------|------------------------|----------------------|
| Tyrosine-protein phosphatase non-receptor type 1                                     | P18031     | PTPN1     | CHEMBL335     | <div><div></div></div> | 4 / 2                  | Tyr Phosphatase      |
| Tyrosine-protein phosphatase non-receptor type 2 ( <i>by homology</i> )              | P17706     | PTPN2     | CHEMBL3807    | <div><div></div></div> | 4 / 2                  | Tyr Phosphatase      |
| Signal transducer and activator of transcription 3                                   | P40763     | STAT3     | CHEMBL4026    | <div><div></div></div> | 0 / 4                  | Transcription Factor |
| Signal transducer and activator of transcription 1-alpha/beta ( <i>by homology</i> ) | P42224     | STAT1     | CHEMBL6101    | <div><div></div></div> | 0 / 4                  | Unclassified         |
| Signal transducer and activator of transcription 2 ( <i>by homology</i> )            | P52630     | STAT2     |               | <div><div></div></div> | 0 / 4                  | Transcription Factor |
| Signal transducer and activator of transcription 4 ( <i>by homology</i> )            | Q14765     | STAT4     |               | <div><div></div></div> | 0 / 4                  | Transcription Factor |
| Fibroblast growth factor 1                                                           | P05230     | FGF1      | CHEMBL2120    | <div><div></div></div> | 0 / 8                  | Secreted             |
| Fibroblast growth factor 2                                                           | P09038     | FGF2      | CHEMBL3107    | <div><div></div></div> | 0 / 8                  | Secreted             |
| Vascular endothelial growth factor A                                                 | P15692     | VEGFA     | CHEMBL1783    | <div><div></div></div> | 0 / 2                  | Secreted             |
| Heparanase 8 kDa subunit                                                             | Q9Y251     | HPSE      | CHEMBL3921    | <div><div></div></div> | 0 / 4                  | Enzyme               |
| Inactive heparanase-2 ( <i>by homology</i> )                                         | Q8WWQ2     | HPSE2     |               | <div><div></div></div> | 0 / 4                  | Enzyme               |
| Muscleblind-like protein 1                                                           | Q9NR56     | MBNL1     | CHEMBL1293317 | <div><div></div></div> | 0 / 3                  | Unclassified         |
| Muscleblind-like protein 2 ( <i>by homology</i> )                                    | Q5VZF2     | MBNL2     |               | <div><div></div></div> | 0 / 3                  | Unclassified         |
| Muscleblind-like protein 3 ( <i>by homology</i> )                                    | Q9NUK0     | MBNL3     |               | <div><div></div></div> | 0 / 3                  | Unclassified         |
| Muscarinic acetylcholine receptor M5 ( <i>by homology</i> )                          | P08912     | CHRM5     | CHEMBL2035    | <div><div></div></div> | 0 / 2                  | Membrane receptor    |

# SwissTargetPrediction report:

## Reference:

Gfeller D., Michielin O. & Zoete V.  
Shaping the interaction landscape of  
bioactive molecules, *Bioinformatics*  
(2013) 29:3073-3079.

## Query Molecule

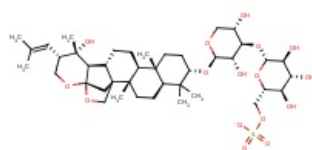

## Frequency of Target Class

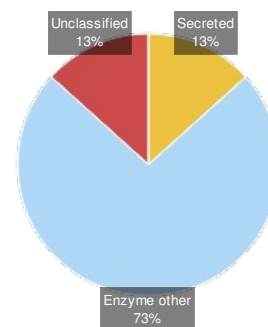

| Target                                             | Uniprot ID | Gene code | ChEMBL ID     | Probability            | # sim. cmpds (3D / 2D) | Target Class |
|----------------------------------------------------|------------|-----------|---------------|------------------------|------------------------|--------------|
| Fibroblast growth factor 1                         | P05230     | FGF1      | CHEMBL2120    | <div><div></div></div> | 0 / 12                 | Secreted     |
| Fibroblast growth factor 2                         | P09038     | FGF2      | CHEMBL3107    | <div><div></div></div> | 0 / 12                 | Secreted     |
| Heparanase 8 kDa subunit                           | Q9Y251     | HPSE      | CHEMBL3921    | <div><div></div></div> | 0 / 7                  | Enzyme       |
| Inactive heparanase-2 (by homology)                | Q8WWQ2     | HPSE2     |               | <div><div></div></div> | 0 / 7                  | Enzyme       |
| Carbonic anhydrase 1                               | P00915     | CA1       | CHEMBL261     | <div><div></div></div> | 1 / 21                 | Enzyme       |
| Carbonic anhydrase 2                               | P00918     | CA2       | CHEMBL205     | <div><div></div></div> | 1 / 21                 | Enzyme       |
| Carbonic anhydrase 5A, mitochondrial (by homology) | P35218     | CA5A      | CHEMBL4789    | <div><div></div></div> | 1 / 21                 | Enzyme       |
| Carbonic anhydrase 7 (by homology)                 | P43166     | CA7       | CHEMBL2326    | <div><div></div></div> | 1 / 21                 | Enzyme       |
| Carbonic anhydrase 13 (by homology)                | Q8N1Q1     | CA13      | CHEMBL3912    | <div><div></div></div> | 1 / 21                 | Enzyme       |
| Carbonic anhydrase 5B, mitochondrial (by homology) | Q9Y2D0     | CA5B      | CHEMBL3969    | <div><div></div></div> | 1 / 21                 | Enzyme       |
| Carbonic anhydrase 3 (by homology)                 | P07451     | CA3       | CHEMBL2885    | <div><div></div></div> | 1 / 21                 | Enzyme       |
| Carbonic anhydrase 4                               | P22748     | CA4       | CHEMBL3729    | <div><div></div></div> | 1 / 1                  | Enzyme       |
| Ras-related protein Rap-1A                         | P62834     | RAP1A     | CHEMBL1255139 | <div><div></div></div> | 0 / 1                  | Unclassified |
| cAMP-specific 3',5'-cyclic phosphodiesterase 4D    | Q08499     | PDE4D     | CHEMBL288     | <div><div></div></div> | 0 / 1                  | Enzyme       |
| Ras-related protein Rap-1b (by homology)           | P61224     | RAP1B     |               | <div><div></div></div> | 0 / 1                  | Unclassified |

# SwissTargetPrediction report:

## Reference:

Gfeller D., Michielin O. & Zoete V.  
Shaping the interaction landscape of  
bioactive molecules, *Bioinformatics*  
(2013) 29:3073-3079.

## Query Molecule

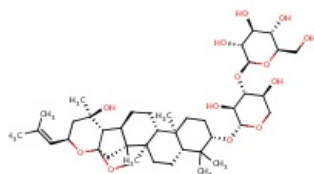

## Frequency of Target Class

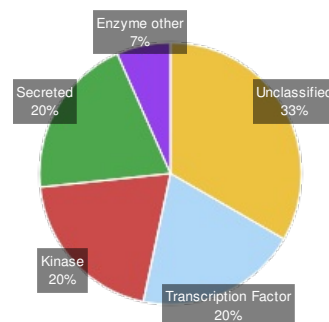

| Target                                                                      | Uniprot ID | Gene code | ChEMBL ID     | Probability            | # sim. cmpds (3D / 2D) | Target Class         |
|-----------------------------------------------------------------------------|------------|-----------|---------------|------------------------|------------------------|----------------------|
| Muscleblind-like protein 1                                                  | Q9NR56     | MBNL1     | CHEMBL1293317 | <div><div></div></div> | 0 / 2                  | Unclassified         |
| Muscleblind-like protein 2 (by homology)                                    | Q5VZF2     | MBNL2     |               | <div><div></div></div> | 0 / 2                  | Unclassified         |
| Muscleblind-like protein 3 (by homology)                                    | Q9NUK0     | MBNL3     |               | <div><div></div></div> | 0 / 2                  | Unclassified         |
| Signal transducer and activator of transcription 3                          | P40763     | STAT3     | CHEMBL4026    | <div><div></div></div> | 0 / 4                  | Transcription Factor |
| Signal transducer and activator of transcription 1-alpha/beta (by homology) | P42224     | STAT1     | CHEMBL6101    | <div><div></div></div> | 0 / 4                  | Unclassified         |
| Signal transducer and activator of transcription 2 (by homology)            | P52630     | STAT2     |               | <div><div></div></div> | 0 / 4                  | Transcription Factor |
| Signal transducer and activator of transcription 4 (by homology)            | Q14765     | STAT4     |               | <div><div></div></div> | 0 / 4                  | Transcription Factor |
| Vascular endothelial growth factor receptor 1                               | P17948     | FLT1      | CHEMBL1868    | <div><div></div></div> | 1 / 1                  | Tyr Kinase           |
| Vascular endothelial growth factor receptor 2                               | P35968     | KDR       | CHEMBL279     | <div><div></div></div> | 1 / 1                  | Tyr Kinase           |
| Vascular endothelial growth factor receptor 3 (by homology)                 | P35916     | FLT4      | CHEMBL1955    | <div><div></div></div> | 1 / 1                  | Tyr Kinase           |
| Microtubule-associated protein tau                                          | P10636     | MAPT      | CHEMBL1293224 | <div><div></div></div> | 0 / 12                 | Unclassified         |
| Fibroblast growth factor 1                                                  | P05230     | FGF1      | CHEMBL2120    | <div><div></div></div> | 0 / 6                  | Secreted             |
| Fibroblast growth factor 2                                                  | P09038     | FGF2      | CHEMBL3107    | <div><div></div></div> | 0 / 6                  | Secreted             |
| Vascular endothelial growth factor A                                        | P15692     | VEGFA     | CHEMBL1783    | <div><div></div></div> | 0 / 2                  | Secreted             |
| Heparanase 8 kDa subunit                                                    | Q9Y251     | HPSE      | CHEMBL3921    | <div><div></div></div> | 0 / 4                  | Enzyme               |

# SwissTargetPrediction report:

## Reference:

Gfeller D., Michielin O. & Zoete V.  
 Shaping the interaction landscape of  
 bioactive molecules, *Bioinformatics*  
 (2013) 29:3073-3079.

## Query Molecule

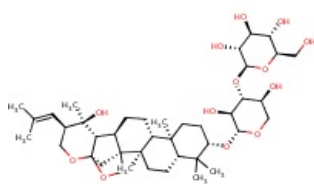

## Frequency of Target Class

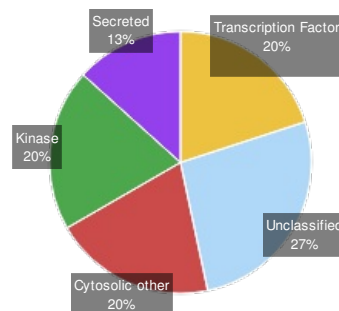

| Target                                                                      | Uniprot ID | Gene code | ChEMBL ID     | Probability            | # sim. cmpds (3D / 2D) | Target Class         |
|-----------------------------------------------------------------------------|------------|-----------|---------------|------------------------|------------------------|----------------------|
| Signal transducer and activator of transcription 3                          | P40763     | STAT3     | CHEMBL4026    | <div><div></div></div> | 0 / 4                  | Transcription Factor |
| Signal transducer and activator of transcription 1-alpha/beta (by homology) | P42224     | STAT1     | CHEMBL6101    | <div><div></div></div> | 0 / 4                  | Unclassified         |
| Signal transducer and activator of transcription 2 (by homology)            | P52630     | STAT2     |               | <div><div></div></div> | 0 / 4                  | Transcription Factor |
| Signal transducer and activator of transcription 4 (by homology)            | Q14765     | STAT4     |               | <div><div></div></div> | 0 / 4                  | Transcription Factor |
| Bcl-2-like protein 1                                                        | Q07817     | BCL2L1    | CHEMBL4625    | <div><div></div></div> | 0 / 1                  | Cytosolic other      |
| Apoptosis regulator Bcl-2 (by homology)                                     | P10415     | BCL2      | CHEMBL4860    | <div><div></div></div> | 0 / 1                  | Cytosolic other      |
| Bcl-2-like protein 2 (by homology)                                          | Q92843     | BCL2L2    | CHEMBL4677    | <div><div></div></div> | 0 / 1                  | Cytosolic other      |
| Muscleblind-like protein 1                                                  | Q9NR56     | MBNL1     | CHEMBL1293317 | <div><div></div></div> | 0 / 3                  | Unclassified         |
| Muscleblind-like protein 2 (by homology)                                    | Q5VZF2     | MBNL2     |               | <div><div></div></div> | 0 / 3                  | Unclassified         |
| Muscleblind-like protein 3 (by homology)                                    | Q9NUK0     | MBNL3     |               | <div><div></div></div> | 0 / 3                  | Unclassified         |
| Vascular endothelial growth factor receptor 1                               | P17948     | FLT1      | CHEMBL1868    | <div><div></div></div> | 1 / 1                  | Tyr Kinase           |
| Vascular endothelial growth factor receptor 2                               | P35968     | KDR       | CHEMBL279     | <div><div></div></div> | 1 / 1                  | Tyr Kinase           |
| Vascular endothelial growth factor receptor 3 (by homology)                 | P35916     | FLT4      | CHEMBL1955    | <div><div></div></div> | 1 / 1                  | Tyr Kinase           |
| Fibroblast growth factor 1                                                  | P05230     | FGF1      | CHEMBL2120    | <div><div></div></div> | 0 / 6                  | Secreted             |
| Fibroblast growth factor 2                                                  | P09038     | FGF2      | CHEMBL3107    | <div><div></div></div> | 0 / 6                  | Secreted             |

# SwissTargetPrediction report:

## Reference:

Gfeller D., Michielin O. & Zoete V.  
 Shaping the interaction landscape of  
 bioactive molecules, *Bioinformatics*  
 (2013) 29:3073-3079.

## Query Molecule



## Frequency of Target Class



| Target                                                                               | Uniprot ID | Gene code | ChEMBL ID     | Probability            | # sim. cmpds (3D / 2D) | Target Class         |
|--------------------------------------------------------------------------------------|------------|-----------|---------------|------------------------|------------------------|----------------------|
| Muscleblind-like protein 1                                                           | Q9NR56     | MBNL1     | CHEMBL1293317 | <div><div></div></div> | 0 / 2                  | Unclassified         |
| Muscleblind-like protein 2 ( <i>by homology</i> )                                    | Q5VZF2     | MBNL2     |               | <div><div></div></div> | 0 / 2                  | Unclassified         |
| Muscleblind-like protein 3 ( <i>by homology</i> )                                    | Q9NUK0     | MBNL3     |               | <div><div></div></div> | 0 / 2                  | Unclassified         |
| Tyrosine-protein phosphatase non-receptor type 1                                     | P18031     | PTPN1     | CHEMBL335     | <div><div></div></div> | 2 / 6                  | Tyr Phosphatase      |
| Tyrosine-protein phosphatase non-receptor type 2 ( <i>by homology</i> )              | P17706     | PTPN2     | CHEMBL3807    | <div><div></div></div> | 2 / 6                  | Tyr Phosphatase      |
| Signal transducer and activator of transcription 3                                   | P40763     | STAT3     | CHEMBL4026    | <div><div></div></div> | 0 / 4                  | Transcription Factor |
| Signal transducer and activator of transcription 1-alpha/beta ( <i>by homology</i> ) | P42224     | STAT1     | CHEMBL6101    | <div><div></div></div> | 0 / 4                  | Unclassified         |
| Signal transducer and activator of transcription 2 ( <i>by homology</i> )            | P52630     | STAT2     |               | <div><div></div></div> | 0 / 4                  | Transcription Factor |
| Signal transducer and activator of transcription 4 ( <i>by homology</i> )            | Q14765     | STAT4     |               | <div><div></div></div> | 0 / 4                  | Transcription Factor |
| Microtubule-associated protein tau                                                   | P10636     | MAPT      | CHEMBL1293224 | <div><div></div></div> | 0 / 12                 | Unclassified         |
| Mu-type opioid receptor                                                              | P35372     | OPRM1     | CHEMBL233     | <div><div></div></div> | 1 / 6                  | Membrane receptor    |
| Delta-type opioid receptor                                                           | P41143     | OPRD1     | CHEMBL236     | <div><div></div></div> | 1 / 6                  | Membrane receptor    |
| Kappa-type opioid receptor                                                           | P41145     | OPRK1     | CHEMBL237     | <div><div></div></div> | 1 / 6                  | Membrane receptor    |
| Nociceptin receptor ( <i>by homology</i> )                                           | P41146     | OPRL1     | CHEMBL2014    | <div><div></div></div> | 1 / 6                  | Membrane receptor    |
| Fibroblast growth factor 1                                                           | P05230     | FGF1      | CHEMBL2120    | <div><div></div></div> | 0 / 6                  | Secreted             |

# SwissTargetPrediction report:

## Reference:

Gfeller D., Michielin O. & Zoete V.  
**Shaping the interaction landscape of bioactive molecules**, *Bioinformatics* (2013) 29:3073-3079.

## Query Molecule

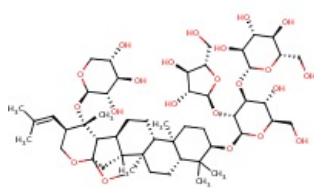

## Frequency of Target Class

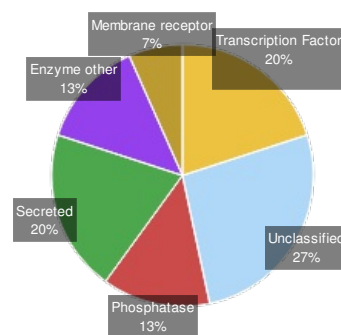

| Target                                                                               | Uniprot ID | Gene code | ChEMBL ID     | Probability            | # sim. cmpds (3D / 2D) | Target Class         |
|--------------------------------------------------------------------------------------|------------|-----------|---------------|------------------------|------------------------|----------------------|
| Signal transducer and activator of transcription 3                                   | P40763     | STAT3     | CHEMBL4026    | <div><div></div></div> | 0 / 4                  | Transcription Factor |
| Signal transducer and activator of transcription 1-alpha/beta ( <i>by homology</i> ) | P42224     | STAT1     | CHEMBL6101    | <div><div></div></div> | 0 / 4                  | Unclassified         |
| Signal transducer and activator of transcription 2 ( <i>by homology</i> )            | P52630     | STAT2     |               | <div><div></div></div> | 0 / 4                  | Transcription Factor |
| Signal transducer and activator of transcription 4 ( <i>by homology</i> )            | Q14765     | STAT4     |               | <div><div></div></div> | 0 / 4                  | Transcription Factor |
| Tyrosine-protein phosphatase non-receptor type 1                                     | P18031     | PTPN1     | CHEMBL335     | <div><div></div></div> | 2 / 2                  | Tyr Phosphatase      |
| Tyrosine-protein phosphatase non-receptor type 2 ( <i>by homology</i> )              | P17706     | PTPN2     | CHEMBL3807    | <div><div></div></div> | 2 / 2                  | Tyr Phosphatase      |
| Fibroblast growth factor 1                                                           | P05230     | FGF1      | CHEMBL2120    | <div><div></div></div> | 0 / 8                  | Secreted             |
| Fibroblast growth factor 2                                                           | P09038     | FGF2      | CHEMBL3107    | <div><div></div></div> | 0 / 8                  | Secreted             |
| Vascular endothelial growth factor A                                                 | P15692     | VEGFA     | CHEMBL1783    | <div><div></div></div> | 0 / 2                  | Secreted             |
| Heparanase 8 kDa subunit                                                             | Q9Y251     | HPSE      | CHEMBL3921    | <div><div></div></div> | 0 / 4                  | Enzyme               |
| Inactive heparanase-2 ( <i>by homology</i> )                                         | Q8WWQ2     | HPSE2     |               | <div><div></div></div> | 0 / 4                  | Enzyme               |
| Muscleblind-like protein 1                                                           | Q9NR56     | MBNL1     | CHEMBL1293317 | <div><div></div></div> | 0 / 3                  | Unclassified         |
| Muscleblind-like protein 2 ( <i>by homology</i> )                                    | Q5VZF2     | MBNL2     |               | <div><div></div></div> | 0 / 3                  | Unclassified         |
| Muscleblind-like protein 3 ( <i>by homology</i> )                                    | Q9NUK0     | MBNL3     |               | <div><div></div></div> | 0 / 3                  | Unclassified         |
| Muscarinic acetylcholine receptor M5 ( <i>by homology</i> )                          | P08912     | CHRM5     | CHEMBL2035    | <div><div></div></div> | 0 / 2                  | Membrane receptor    |

# SwissTargetPrediction report:

## Reference:

Gfeller D., Michielin O. & Zoete V.  
Shaping the interaction landscape of  
bioactive molecules, *Bioinformatics*  
(2013) 29:3073-3079.

## Query Molecule

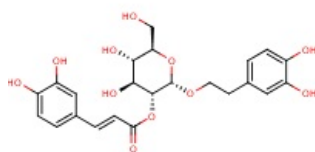

## Frequency of Target Class

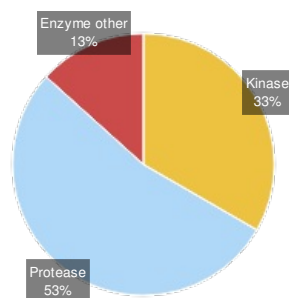

| Target                                                       | Uniprot ID | Gene code | ChEMBL ID  | Probability            | # sim. cmpds (3D / 2D) | Target Class     |
|--------------------------------------------------------------|------------|-----------|------------|------------------------|------------------------|------------------|
| Protein kinase C gamma type (by homology)                    | P05129     | PRKCG     | CHEMBL2938 | <div><div></div></div> | 10 / 43                | Ser_Thr Kinase   |
| Protein kinase C beta type (by homology)                     | P05771     | PRKCB     | CHEMBL3045 | <div><div></div></div> | 10 / 43                | Ser_Thr Kinase   |
| Protein kinase C alpha type                                  | P17252     | PRKCA     | CHEMBL299  | <div><div></div></div> | 10 / 43                | Ser_Thr Kinase   |
| Protein kinase C theta type (by homology)                    | Q04759     | PRKCQ     | CHEMBL3920 | <div><div></div></div> | 10 / 45                | Ser_Thr Kinase   |
| Protein kinase C delta type regulatory subunit (by homology) | Q05655     | PRKCD     | CHEMBL2996 | <div><div></div></div> | 10 / 45                | Ser_Thr Kinase   |
| PEX                                                          | P08253     | MMP2      | CHEMBL333  | <div><div></div></div> | 17 / 6                 | Metallo Protease |
| 67 kDa matrix metalloproteinase-9 (by homology)              | P14780     | MMP9      | CHEMBL321  | <div><div></div></div> | 17 / 6                 | Metallo Protease |
| 22 kDa interstitial collagenase                              | P03956     | MMP1      | CHEMBL332  | <div><div></div></div> | 17 / 5                 | Metallo Protease |
| Stromelysin-1 (by homology)                                  | P08254     | MMP3      | CHEMBL283  | <div><div></div></div> | 17 / 5                 | Metallo Protease |
| Macrophage metalloelastase                                   | P39900     | MMP12     | CHEMBL4393 | <div><div></div></div> | 14 / 5                 | Metallo Protease |
| Collagenase 3                                                | P45452     | MMP13     | CHEMBL280  | <div><div></div></div> | 14 / 5                 | Metallo Protease |
| Stromelysin-2 (by homology)                                  | P09238     | MMP10     | CHEMBL4270 | <div><div></div></div> | 17 / 5                 | Metallo Protease |
| Matrix metalloproteinase-27 (by homology)                    | Q9H306     | MMP27     |            | <div><div></div></div> | 17 / 5                 | Metallo Protease |
| Aldo-keto reductase family 1 member B10                      | O60218     | AKR1B10   | CHEMBL5983 | <div><div></div></div> | 15 / 23                | Enzyme           |
| Aldose reductase                                             | P15121     | AKR1B1    | CHEMBL1900 | <div><div></div></div> | 15 / 23                | Enzyme           |

# SwissTargetPrediction report:

## Reference:

Gfeller D., Michielin O. & Zoete V.  
 Shaping the interaction landscape of  
 bioactive molecules, *Bioinformatics*  
 (2013) 29:3073-3079.

## Query Molecule

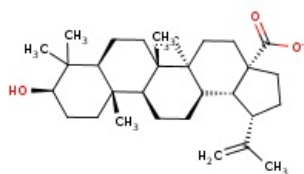

## Frequency of Target Class

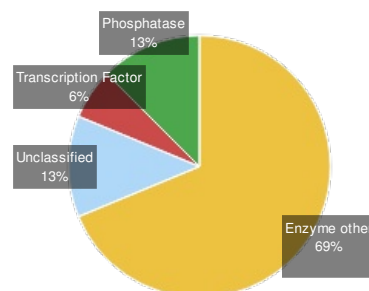

| Target                                                            | Uniprot ID    | Gene code | ChEMBL ID     | Probability            | # sim. cmpds (3D / 2D) | Target Class            |
|-------------------------------------------------------------------|---------------|-----------|---------------|------------------------|------------------------|-------------------------|
| Aldo-keto reductase family 1 member B10                           | O60218        | AKR1B10   | CHEMBL5983    | <div><div></div></div> | 4 / 8                  | Enzyme                  |
| DNA polymerase beta (by homology)                                 | P06746        | POLB      | CHEMBL2392    | <div><div></div></div> | 7 / 11                 | Enzyme                  |
| Aldose reductase (by homology)                                    | P15121        | AKR1B1    | CHEMBL1900    | <div><div></div></div> | 4 / 8                  | Enzyme                  |
| Aldo-keto reductase family 1 member B15 (by homology)             | C9JRZ8        | AKR1B15   |               | <div><div></div></div> | 4 / 8                  | Enzyme                  |
| Alcohol dehydrogenase [NADP(+)] (by homology)                     | P14550        | AKR1A1    | CHEMBL2246    | <div><div></div></div> | 4 / 8                  | Enzyme                  |
| 1,5-anhydro-D-fructose reductase (by homology)                    | Q96JD6        | AKR1E2    |               | <div><div></div></div> | 4 / 8                  | Enzyme                  |
| Complex                                                           | Q9UBE0/Q9UBT2 | SAE1/UBA2 | CHEMBL2095174 | <div><div></div></div> | 1 / 1                  | Unclassified /Enzyme    |
| Microtubule-associated protein tau                                | P10636        | MAPT      | CHEMBL1293224 | <div><div></div></div> | 4 / 17                 | Unclassified            |
| Corticosteroid 11-beta-dehydrogenase isozyme 1                    | P28845        | HSD11B1   | CHEMBL4235    | <div><div></div></div> | 20 / 21                | Enzyme                  |
| Hydroxysteroid 11-beta-dehydrogenase 1-like protein (by homology) | Q7Z5J1        | HSD11B1L  |               | <div><div></div></div> | 20 / 21                | Enzyme                  |
| Bile acid receptor                                                | Q96RI1        | NR1H4     | CHEMBL2047    | <div><div></div></div> | 22 / 13                | Transcription Factor    |
| M-phase inducer phosphatase 1                                     | P30304        | CDC25A    | CHEMBL3775    | <div><div></div></div> | 3 / 19                 | Ser_Thr_Tyr Phosphatase |
| M-phase inducer phosphatase 2 (by homology)                       | P30305        | CDC25B    | CHEMBL4804    | <div><div></div></div> | 3 / 19                 | Ser_Thr_Tyr Phosphatase |
| DNA topoisomerase 2-alpha                                         | P11388        | TOP2A     | CHEMBL1806    | <div><div></div></div> | 1 / 2                  | Enzyme                  |
| DNA topoisomerase 2-beta (by homology)                            | Q02880        | TOP2B     | CHEMBL3396    | <div><div></div></div> | 1 / 2                  | Enzyme                  |



# SwissTargetPrediction report:

## Reference:

Gfeller D., Michielin O. & Zoete V.  
 Shaping the interaction landscape of  
 bioactive molecules, *Bioinformatics*  
 (2013) 29:3073-3079.

## Query Molecule

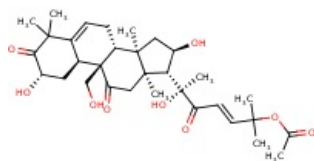

## Frequency of Target Class

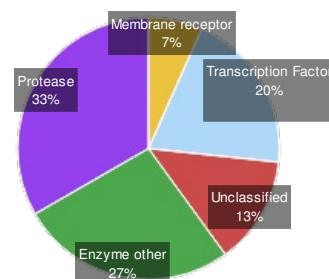

| Target                                                                      | Uniprot ID | Gene code | ChEMBL ID     | Probability            | # sim. cmpds (3D / 2D) | Target Class         |
|-----------------------------------------------------------------------------|------------|-----------|---------------|------------------------|------------------------|----------------------|
| Integrin alpha-L                                                            | P20701     | ITGAL     | CHEMBL1803    | <div><div></div></div> | 1 / 4                  | Membrane receptor    |
| Signal transducer and activator of transcription 3                          | P40763     | STAT3     | CHEMBL4026    | <div><div></div></div> | 2 / 1                  | Transcription Factor |
| Signal transducer and activator of transcription 1-alpha/beta (by homology) | P42224     | STAT1     | CHEMBL6101    | <div><div></div></div> | 2 / 1                  | Unclassified         |
| Signal transducer and activator of transcription 2 (by homology)            | P52630     | STAT2     |               | <div><div></div></div> | 2 / 1                  | Transcription Factor |
| Signal transducer and activator of transcription 4 (by homology)            | Q14765     | STAT4     |               | <div><div></div></div> | 2 / 1                  | Transcription Factor |
| DNA polymerase alpha catalytic subunit                                      | P09884     | POLA1     | CHEMBL1828    | <div><div></div></div> | 2 / 10                 | Enzyme               |
| Quinone oxidoreductase (by homology)                                        | Q08257     | CRYZ      | CHEMBL6118    | <div><div></div></div> | 10 / 24                | Enzyme               |
| Microtubule-associated protein tau                                          | P10636     | MAPT      | CHEMBL1293224 | <div><div></div></div> | 102 / 31               | Unclassified         |
| 3-hydroxy-3-methylglutaryl-coenzyme A reductase (by homology)               | P04035     | HMGCR     | CHEMBL402     | <div><div></div></div> | 27 / 75                | Enzyme               |
| Tubulin--tyrosine ligase                                                    | Q8NG68     | TTL       | CHEMBL5549    | <div><div></div></div> | 7 / 12                 | Enzyme               |
| 22 kDa interstitial collagenase                                             | P03956     | MMP1      | CHEMBL332     | <div><div></div></div> | 118 / 3                | Metallo Protease     |
| Stromelysin-1                                                               | P08254     | MMP3      | CHEMBL283     | <div><div></div></div> | 118 / 3                | Metallo Protease     |
| Neutrophil collagenase (by homology)                                        | P22894     | MMP8      | CHEMBL4588    | <div><div></div></div> | 94 / 3                 | Metallo Protease     |
| Macrophage metalloelastase (by homology)                                    | P39900     | MMP12     | CHEMBL4393    | <div><div></div></div> | 110 / 3                | Metallo Protease     |
| Collagenase 3 (by homology)                                                 | P45452     | MMP13     | CHEMBL280     | <div><div></div></div> | 110 / 3                | Metallo Protease     |

# SwissTargetPrediction report:

## Reference:

Gfeller D., Michielin O. & Zoete V.  
Shaping the interaction landscape of  
bioactive molecules, *Bioinformatics*  
(2013) 29:3073-3079.

## Query Molecule

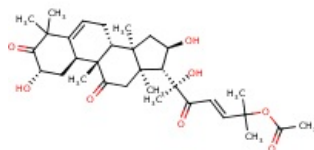

## Frequency of Target Class



| Target                                                                      | Uniprot ID | Gene code | ChEMBL ID     | Probability            | # sim. cmpds (3D / 2D) | Target Class         |
|-----------------------------------------------------------------------------|------------|-----------|---------------|------------------------|------------------------|----------------------|
| Integrin alpha-L                                                            | P20701     | ITGAL     | CHEMBL1803    | <div><div></div></div> | 3 / 4                  | Membrane receptor    |
| Signal transducer and activator of transcription 3                          | P40763     | STAT3     | CHEMBL4026    | <div><div></div></div> | 4 / 1                  | Transcription Factor |
| Signal transducer and activator of transcription 1-alpha/beta (by homology) | P42224     | STAT1     | CHEMBL6101    | <div><div></div></div> | 4 / 1                  | Unclassified         |
| Signal transducer and activator of transcription 4 (by homology)            | Q14765     | STAT4     |               | <div><div></div></div> | 4 / 1                  | Transcription Factor |
| Signal transducer and activator of transcription 2 (by homology)            | P52630     | STAT2     |               | <div><div></div></div> | 3 / 1                  | Transcription Factor |
| Microtubule-associated protein tau                                          | P10636     | MAPT      | CHEMBL1293224 | <div><div></div></div> | 234 / 32               | Unclassified         |
| DNA polymerase alpha catalytic subunit                                      | P09884     | POLA1     | CHEMBL1828    | <div><div></div></div> | 3 / 10                 | Enzyme               |
| Nitric oxide synthase, brain (by homology)                                  | P29475     | NOS1      | CHEMBL3568    | <div><div></div></div> | 12 / 15                | Enzyme               |
| Nitric oxide synthase, inducible                                            | P35228     | NOS2      | CHEMBL4481    | <div><div></div></div> | 12 / 15                | Enzyme               |
| Nitric oxide synthase, endothelial (by homology)                            | P29474     | NOS3      | CHEMBL4803    | <div><div></div></div> | 12 / 15                | Enzyme               |
| 22 kDa interstitial collagenase                                             | P03956     | MMP1      | CHEMBL332     | <div><div></div></div> | 280 / 3                | Metallo Protease     |
| Stromelysin-1                                                               | P08254     | MMP3      | CHEMBL283     | <div><div></div></div> | 280 / 3                | Metallo Protease     |
| Stromelysin-2 (by homology)                                                 | P09238     | MMP10     | CHEMBL4270    | <div><div></div></div> | 280 / 3                | Metallo Protease     |
| Neutrophil collagenase (by homology)                                        | P22894     | MMP8      | CHEMBL4588    | <div><div></div></div> | 212 / 3                | Metallo Protease     |
| Macrophage metalloelastase (by homology)                                    | P39900     | MMP12     | CHEMBL4393    | <div><div></div></div> | 264 / 3                | Metallo Protease     |

# SwissTargetPrediction report:

## Reference:

Gfeller D., Michielin O. & Zoete V.  
 Shaping the interaction landscape of  
 bioactive molecules, *Bioinformatics*  
 (2013) 29:3073-3079.

## Query Molecule

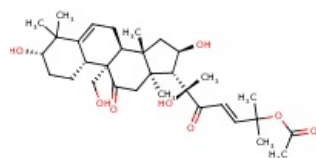

## Frequency of Target Class

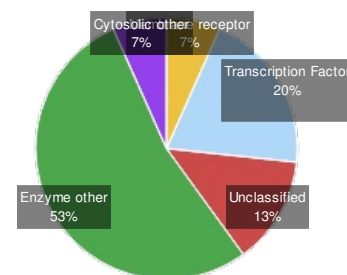

| Target                                                                      | Uniprot ID | Gene code | ChEMBL ID     | Probability            | # sim. cmpds (3D / 2D) | Target Class         |
|-----------------------------------------------------------------------------|------------|-----------|---------------|------------------------|------------------------|----------------------|
| Integrin alpha-L                                                            | P20701     | ITGAL     | CHEMBL1803    | <div><div></div></div> | 3 / 4                  | Membrane receptor    |
| Signal transducer and activator of transcription 3                          | P40763     | STAT3     | CHEMBL4026    | <div><div></div></div> | 3 / 1                  | Transcription Factor |
| Signal transducer and activator of transcription 1-alpha/beta (by homology) | P42224     | STAT1     | CHEMBL6101    | <div><div></div></div> | 3 / 1                  | Unclassified         |
| Signal transducer and activator of transcription 4 (by homology)            | Q14765     | STAT4     |               | <div><div></div></div> | 3 / 1                  | Transcription Factor |
| Signal transducer and activator of transcription 2 (by homology)            | P52630     | STAT2     |               | <div><div></div></div> | 2 / 1                  | Transcription Factor |
| Microtubule-associated protein tau                                          | P10636     | MAPT      | CHEMBL1293224 | <div><div></div></div> | 70 / 32                | Unclassified         |
| DNA polymerase alpha catalytic subunit                                      | P09884     | POLA1     | CHEMBL1828    | <div><div></div></div> | 2 / 10                 | Enzyme               |
| Quinone oxidoreductase (by homology)                                        | Q08257     | CRYZ      | CHEMBL6118    | <div><div></div></div> | 10 / 24                | Enzyme               |
| Corticosteroid 11-beta-dehydrogenase isozyme 1                              | P28845     | HSD11B1   | CHEMBL4235    | <div><div></div></div> | 64 / 21                | Enzyme               |
| Hydroxysteroid 11-beta-dehydrogenase 1-like protein (by homology)           | Q7Z5J1     | HSD11B1L  |               | <div><div></div></div> | 64 / 21                | Enzyme               |
| Nitric oxide synthase, inducible (by homology)                              | P35228     | NOS2      | CHEMBL4481    | <div><div></div></div> | 2 / 15                 | Enzyme               |
| Nitric oxide synthase, endothelial (by homology)                            | P29474     | NOS3      | CHEMBL4803    | <div><div></div></div> | 2 / 15                 | Enzyme               |
| Nitric oxide synthase, brain (by homology)                                  | P29475     | NOS1      | CHEMBL3568    | <div><div></div></div> | 2 / 15                 | Enzyme               |
| 3-hydroxy-3-methylglutaryl-coenzyme A reductase (by homology)               | P04035     | HMGCR     | CHEMBL402     | <div><div></div></div> | 32 / 79                | Enzyme               |
| Apoptosis regulator Bcl-2                                                   | P10415     | BCL2      | CHEMBL4860    | <div><div></div></div> | 7 / 2                  | Cytosolic other      |

# SwissTargetPrediction report:

## Reference:

Gfeller D., Michielin O. & Zoete V.  
Shaping the interaction landscape of  
bioactive molecules, *Bioinformatics*  
(2013) 29:3073-3079.

## Query Molecule

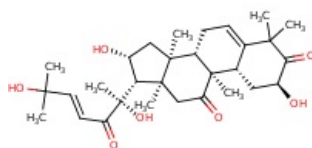

## Frequency of Target Class

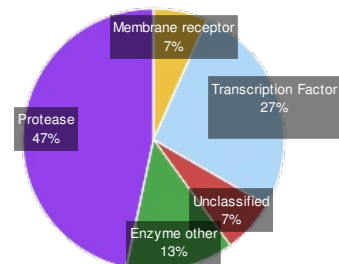

| Target                                                                      | Uniprot ID | Gene code | ChEMBL ID  | Probability            | # sim. cmpds (3D / 2D) | Target Class         |
|-----------------------------------------------------------------------------|------------|-----------|------------|------------------------|------------------------|----------------------|
| Integrin alpha-L                                                            | P20701     | ITGAL     | CHEMBL1803 | <div><div></div></div> | 3 / 4                  | Membrane receptor    |
| Signal transducer and activator of transcription 3                          | P40763     | STAT3     | CHEMBL4026 | <div><div></div></div> | 3 / 1                  | Transcription Factor |
| Signal transducer and activator of transcription 1-alpha/beta (by homology) | P42224     | STAT1     | CHEMBL6101 | <div><div></div></div> | 3 / 1                  | Unclassified         |
| Signal transducer and activator of transcription 2 (by homology)            | P52630     | STAT2     |            | <div><div></div></div> | 3 / 1                  | Transcription Factor |
| Signal transducer and activator of transcription 4 (by homology)            | Q14765     | STAT4     |            | <div><div></div></div> | 3 / 1                  | Transcription Factor |
| Prostaglandin G/H synthase 1 (by homology)                                  | P23219     | PTGS1     | CHEMBL221  | <div><div></div></div> | 18 / 6                 | Enzyme               |
| Prostaglandin G/H synthase 2                                                | P35354     | PTGS2     | CHEMBL230  | <div><div></div></div> | 18 / 6                 | Enzyme               |
| 22 kDa interstitial collagenase                                             | P03956     | MMP1      | CHEMBL332  | <div><div></div></div> | 102 / 3                | Metallo Protease     |
| Stromelysin-1                                                               | P08254     | MMP3      | CHEMBL283  | <div><div></div></div> | 102 / 3                | Metallo Protease     |
| Neutrophil collagenase                                                      | P22894     | MMP8      | CHEMBL4588 | <div><div></div></div> | 88 / 3                 | Metallo Protease     |
| Macrophage metalloelastase (by homology)                                    | P39900     | MMP12     | CHEMBL4393 | <div><div></div></div> | 91 / 3                 | Metallo Protease     |
| Collagenase 3 (by homology)                                                 | P45452     | MMP13     | CHEMBL280  | <div><div></div></div> | 91 / 3                 | Metallo Protease     |
| Stromelysin-2 (by homology)                                                 | P09238     | MMP10     | CHEMBL4270 | <div><div></div></div> | 102 / 3                | Metallo Protease     |
| Matrix metalloproteinase-27 (by homology)                                   | Q9H306     | MMP27     |            | <div><div></div></div> | 102 / 3                | Metallo Protease     |
| Glucocorticoid receptor                                                     | P04150     | NR3C1     | CHEMBL2034 | <div><div></div></div> | 52 / 39                | Transcription Factor |

# SwissTargetPrediction report:

## Reference:

Gfeller D., Michielin O. & Zoete V.  
Shaping the interaction landscape of  
bioactive molecules, *Bioinformatics*  
(2013) 29:3073-3079.

## Query Molecule

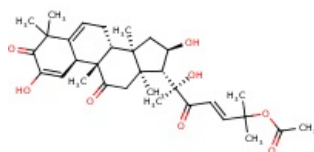

## Frequency of Target Class

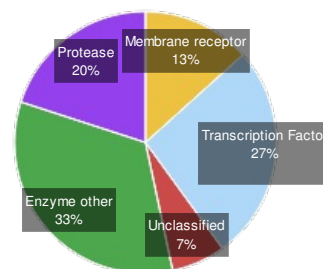

| Target                                                                      | Uniprot ID | Gene code | ChEMBL ID  | Probability            | # sim. cmpds (3D / 2D) | Target Class         |
|-----------------------------------------------------------------------------|------------|-----------|------------|------------------------|------------------------|----------------------|
| Integrin alpha-L                                                            | P20701     | ITGAL     | CHEMBL1803 | <div><div></div></div> | 2 / 4                  | Membrane receptor    |
| Signal transducer and activator of transcription 3                          | P40763     | STAT3     | CHEMBL4026 | <div><div></div></div> | 2 / 1                  | Transcription Factor |
| Signal transducer and activator of transcription 1-alpha/beta (by homology) | P42224     | STAT1     | CHEMBL6101 | <div><div></div></div> | 2 / 1                  | Unclassified         |
| Signal transducer and activator of transcription 4 (by homology)            | Q14765     | STAT4     |            | <div><div></div></div> | 2 / 1                  | Transcription Factor |
| Signal transducer and activator of transcription 2 (by homology)            | P52630     | STAT2     |            | <div><div></div></div> | 1 / 1                  | Transcription Factor |
| Quinone oxidoreductase (by homology)                                        | Q08257     | CRYZ      | CHEMBL6118 | <div><div></div></div> | 4 / 24                 | Enzyme               |
| DNA polymerase alpha catalytic subunit                                      | P09884     | POLA1     | CHEMBL1828 | <div><div></div></div> | 1 / 7                  | Enzyme               |
| Adenosine receptor A1                                                       | P30542     | ADORA1    | CHEMBL226  | <div><div></div></div> | 41 / 1                 | Membrane receptor    |
| Nuclear receptor subfamily 1 group I member 2                               | O75469     | NR1I2     | CHEMBL3401 | <div><div></div></div> | 5 / 1                  | Transcription Factor |
| Prostaglandin G/H synthase 1                                                | P23219     | PTGS1     | CHEMBL221  | <div><div></div></div> | 3 / 8                  | Enzyme               |
| Prostaglandin G/H synthase 2                                                | P35354     | PTGS2     | CHEMBL230  | <div><div></div></div> | 3 / 8                  | Enzyme               |
| Cytochrome P450 19A1                                                        | P11511     | CYP19A1   | CHEMBL1978 | <div><div></div></div> | 1 / 71                 | Enzyme               |
| 22 kDa interstitial collagenase                                             | P03956     | MMP1      | CHEMBL332  | <div><div></div></div> | 94 / 2                 | Metallo Protease     |
| Stromelysin-1                                                               | P08254     | MMP3      | CHEMBL283  | <div><div></div></div> | 94 / 2                 | Metallo Protease     |
| Neutrophil collagenase (by homology)                                        | P22894     | MMP8      | CHEMBL4588 | <div><div></div></div> | 86 / 2                 | Metallo Protease     |

# SwissTargetPrediction report:

## Reference:

Gfeller D., Michielin O. & Zoete V.  
Shaping the interaction landscape of  
bioactive molecules, *Bioinformatics*  
(2013) 29:3073-3079.

## Query Molecule

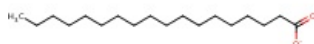

## Frequency of Target Class

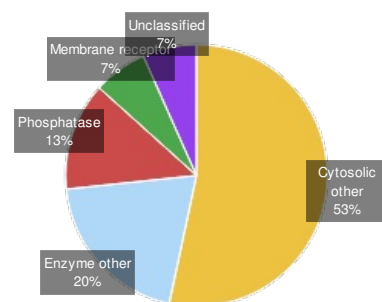

| Target                                                            | Uniprot ID | Gene code | ChEMBL ID     | Probability            | # sim. cmpds (3D / 2D) | Target Class            |
|-------------------------------------------------------------------|------------|-----------|---------------|------------------------|------------------------|-------------------------|
| Fatty acid-binding protein, heart                                 | P05413     | FABP3     | CHEMBL3344    | <div><div></div></div> | 9 / 3                  | Cytosolic other         |
| Fatty acid-binding protein, adipocyte                             | P15090     | FABP4     | CHEMBL2083    | <div><div></div></div> | 9 / 3                  | Cytosolic other         |
| Fatty acid-binding protein, epidermal                             | Q01469     | FABP5     | CHEMBL3674    | <div><div></div></div> | 9 / 3                  | Cytosolic other         |
| Fatty acid-binding protein 12 (by homology)                       | A6NFH5     | FABP12    |               | <div><div></div></div> | 9 / 3                  | Cytosolic other         |
| Fatty acid-binding protein, brain (by homology)                   | O15540     | FABP7     |               | <div><div></div></div> | 9 / 3                  | Cytosolic other         |
| Myelin P2 protein (by homology)                                   | P02689     | PMP2      |               | <div><div></div></div> | 9 / 3                  | Cytosolic other         |
| Fatty acid-binding protein 9 (by homology)                        | Q0Z7S8     | FABP9     |               | <div><div></div></div> | 9 / 3                  | Cytosolic other         |
| Fatty acid-binding protein, intestinal                            | P12104     | FABP2     | CHEMBL4879    | <div><div></div></div> | 1 / 1                  | Cytosolic other         |
| Tyrosyl-DNA phosphodiesterase 1                                   | Q9NUW8     | TDP1      | CHEMBL1075138 | <div><div></div></div> | 6 / 13                 | Enzyme                  |
| M-phase inducer phosphatase 1                                     | P30304     | CDC25A    | CHEMBL3775    | <div><div></div></div> | 12 / 16                | Ser_Thr_Tyr Phosphatase |
| M-phase inducer phosphatase 2 (by homology)                       | P30305     | CDC25B    | CHEMBL4804    | <div><div></div></div> | 12 / 16                | Ser_Thr_Tyr Phosphatase |
| Corticosteroid 11-beta-dehydrogenase isozyme 1                    | P28845     | HSD11B1   | CHEMBL4235    | <div><div></div></div> | 16 / 10                | Enzyme                  |
| Hydroxysteroid 11-beta-dehydrogenase 1-like protein (by homology) | Q7Z5J1     | HSD11B1L  |               | <div><div></div></div> | 16 / 10                | Enzyme                  |
| Prostaglandin E2 receptor EP2 subtype                             | P43116     | PTGER2    | CHEMBL1881    | <div><div></div></div> | 93 / 5                 | Membrane receptor       |
| Microtubule-associated protein tau                                | P10636     | MAPT      | CHEMBL1293224 | <div><div></div></div> | 3 / 8                  | Unclassified            |

# SwissTargetPrediction report:

## Reference:

Gfeller D., Michielin O. & Zoete V.  
Shaping the interaction landscape of  
bioactive molecules, *Bioinformatics*  
(2013) 29:3073-3079.

## Query Molecule

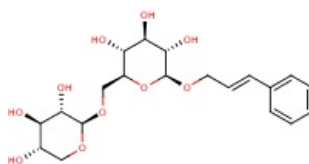

## Frequency of Target Class

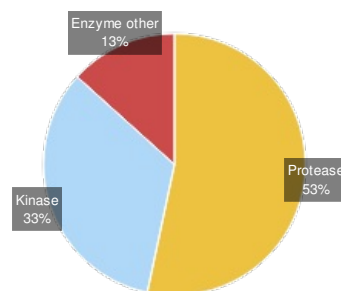

| Target                                                       | Uniprot ID | Gene code | ChEMBL ID     | Probability            | # sim. cmpds (3D / 2D) | Target Class     |
|--------------------------------------------------------------|------------|-----------|---------------|------------------------|------------------------|------------------|
| 22 kDa interstitial collagenase                              | P03956     | MMP1      | CHEMBL332     | <div><div></div></div> | 1 / 2                  | Metallo Protease |
| Macrophage metalloelastase                                   | P39900     | MMP12     | CHEMBL4393    | <div><div></div></div> | 1 / 2                  | Metallo Protease |
| Collagenase 3                                                | P45452     | MMP13     | CHEMBL280     | <div><div></div></div> | 1 / 2                  | Metallo Protease |
| Stromelysin-1 (by homology)                                  | P08254     | MMP3      | CHEMBL283     | <div><div></div></div> | 1 / 2                  | Metallo Protease |
| Stromelysin-2 (by homology)                                  | P09238     | MMP10     | CHEMBL4270    | <div><div></div></div> | 1 / 2                  | Metallo Protease |
| Matrix metalloproteinase-27 (by homology)                    | Q9H306     | MMP27     |               | <div><div></div></div> | 1 / 2                  | Metallo Protease |
| PEX                                                          | P08253     | MMP2      | CHEMBL333     | <div><div></div></div> | 1 / 2                  | Metallo Protease |
| 67 kDa matrix metalloproteinase-9 (by homology)              | P14780     | MMP9      | CHEMBL321     | <div><div></div></div> | 1 / 2                  | Metallo Protease |
| Protein kinase C gamma type (by homology)                    | P05129     | PRKCG     | CHEMBL2938    | <div><div></div></div> | 2 / 22                 | Ser_Thr Kinase   |
| Protein kinase C beta type (by homology)                     | P05771     | PRKCB     | CHEMBL3045    | <div><div></div></div> | 2 / 22                 | Ser_Thr Kinase   |
| Protein kinase C alpha type                                  | P17252     | PRKCA     | CHEMBL299     | <div><div></div></div> | 2 / 22                 | Ser_Thr Kinase   |
| Protein kinase C theta type (by homology)                    | Q04759     | PRKCQ     | CHEMBL3920    | <div><div></div></div> | 2 / 23                 | Ser_Thr Kinase   |
| Protein kinase C delta type regulatory subunit (by homology) | Q05655     | PRKCD     | CHEMBL2996    | <div><div></div></div> | 2 / 23                 | Ser_Thr Kinase   |
| Squalene synthase                                            | P37268     | FDFT1     | CHEMBL3338    | <div><div></div></div> | 117 / 162              | Enzyme           |
| Matrix metalloproteinase-20 (by homology)                    | O60882     | MMP20     | CHEMBL1938226 | <div><div></div></div> | 1 / 1                  | Enzyme           |

# SwissTargetPrediction report:

## Reference:

Gfeller D., Michielin O. & Zoete V.  
Shaping the interaction landscape of  
bioactive molecules, *Bioinformatics*  
(2013) 29:3073-3079.

## Query Molecule

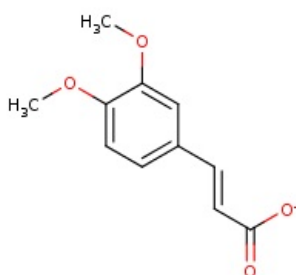

## Frequency of Target Class

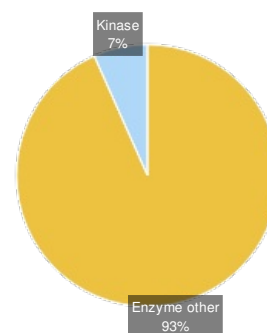

| Target                                                                               | Uniprot ID | Gene code | ChEMBL ID  | Probability            | # sim. cmpds (3D / 2D) | Target Class       |
|--------------------------------------------------------------------------------------|------------|-----------|------------|------------------------|------------------------|--------------------|
| Carbonic anhydrase 1                                                                 | P00915     | CA1       | CHEMBL261  | <div><div></div></div> | 31 / 13                | Enzyme             |
| Carbonic anhydrase 2                                                                 | P00918     | CA2       | CHEMBL205  | <div><div></div></div> | 31 / 13                | Enzyme             |
| Carbonic anhydrase 3 ( <i>by homology</i> )                                          | P07451     | CA3       | CHEMBL2885 | <div><div></div></div> | 31 / 13                | Enzyme             |
| Carbonic anhydrase 5A, mitochondrial                                                 | P35218     | CA5A      | CHEMBL4789 | <div><div></div></div> | 31 / 13                | Enzyme             |
| Carbonic anhydrase 7                                                                 | P43166     | CA7       | CHEMBL2326 | <div><div></div></div> | 31 / 13                | Enzyme             |
| Carbonic anhydrase 13 ( <i>by homology</i> )                                         | Q8N1Q1     | CA13      | CHEMBL3912 | <div><div></div></div> | 31 / 13                | Enzyme             |
| Carbonic anhydrase 5B, mitochondrial ( <i>by homology</i> )                          | Q9Y2D0     | CA5B      | CHEMBL3969 | <div><div></div></div> | 31 / 13                | Enzyme             |
| Carbonic anhydrase 12                                                                | O43570     | CA12      | CHEMBL3242 | <div><div></div></div> | 10 / 10                | Enzyme             |
| Carbonic anhydrase 9                                                                 | Q16790     | CA9       | CHEMBL3594 | <div><div></div></div> | 10 / 10                | Enzyme             |
| Carbonic anhydrase 14                                                                | Q9ULX7     | CA14      | CHEMBL3510 | <div><div></div></div> | 10 / 10                | Enzyme             |
| Dual specificity tyrosine-phosphorylation-regulated kinase 1A ( <i>by homology</i> ) | Q13627     | DYRK1A    | CHEMBL2292 | <div><div></div></div> | 14 / 14                | Ser_Thr_Tyr Kinase |
| Amine oxidase [flavin-containing] A                                                  | P21397     | MAOA      | CHEMBL1951 | <div><div></div></div> | 3 / 10                 | Enzyme             |
| Amine oxidase [flavin-containing] B                                                  | P27338     | MAOB      | CHEMBL2039 | <div><div></div></div> | 3 / 11                 | Enzyme             |
| Prostaglandin G/H synthase 1                                                         | P23219     | PTGS1     | CHEMBL221  | <div><div></div></div> | 54 / 20                | Enzyme             |
| Prostaglandin G/H synthase 2                                                         | P35354     | PTGS2     | CHEMBL230  | <div><div></div></div> | 54 / 20                | Enzyme             |



# SwissTargetPrediction report:

## Reference:

Gfeller D., Michielin O. & Zoete V.  
 Shaping the interaction landscape of  
 bioactive molecules, *Bioinformatics*  
 (2013) 29:3073-3079.

## Query Molecule

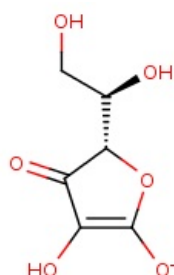

## Frequency of Target Class

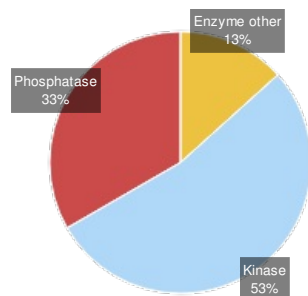

| Target                                                                      | Uniprot ID | Gene code | ChEMBL ID     | Probability            | # sim. cmpds (3D / 2D) | Target Class            |
|-----------------------------------------------------------------------------|------------|-----------|---------------|------------------------|------------------------|-------------------------|
| Tyrosyl-DNA phosphodiesterase 1                                             | Q9NUW8     | TDP1      | CHEMBL1075138 | <div><div></div></div> | 0 / 2                  | Enzyme                  |
| Tubulin--tyrosine ligase                                                    | Q8NG68     | TTL       | CHEMBL5549    | <div><div></div></div> | 0 / 12                 | Enzyme                  |
| Protein kinase C alpha type                                                 | P17252     | PRKCA     | CHEMBL299     | <div><div></div></div> | 0 / 141                | Ser_Thr Kinase          |
| Protein kinase C delta type regulatory subunit ( <i>by homology</i> )       | Q05655     | PRKCD     | CHEMBL2996    | <div><div></div></div> | 0 / 143                | Ser_Thr Kinase          |
| Protein kinase C theta type ( <i>by homology</i> )                          | Q04759     | PRKCQ     | CHEMBL3920    | <div><div></div></div> | 0 / 143                | Ser_Thr Kinase          |
| Protein kinase C gamma type ( <i>by homology</i> )                          | P05129     | PRKCG     | CHEMBL2938    | <div><div></div></div> | 0 / 141                | Ser_Thr Kinase          |
| Protein kinase C beta type ( <i>by homology</i> )                           | P05771     | PRKCB     | CHEMBL3045    | <div><div></div></div> | 0 / 141                | Ser_Thr Kinase          |
| Dual specificity protein phosphatase 3                                      | P51452     | DUSP3     | CHEMBL2635    | <div><div></div></div> | 0 / 1                  | Ser_Thr_Tyr Phosphatase |
| Inactive dual specificity phosphatase 27 ( <i>by homology</i> )             | Q5VZP5     | DUSP27    |               | <div><div></div></div> | 0 / 1                  | Ser_Thr_Tyr Phosphatase |
| Dual specificity phosphatase DUPD1 ( <i>by homology</i> )                   | Q68J44     | DUPD1     |               | <div><div></div></div> | 0 / 1                  | Ser_Thr_Tyr Phosphatase |
| Dual specificity protein phosphatase 13 isoform MDSP ( <i>by homology</i> ) | Q6B811     | DUSP13    |               | <div><div></div></div> | 0 / 1                  | Ser_Thr_Tyr Phosphatase |
| Dual specificity protein phosphatase 26 ( <i>by homology</i> )              | Q9BV47     | DUSP26    |               | <div><div></div></div> | 0 / 1                  | Ser_Thr_Tyr Phosphatase |
| Ribosomal protein S6 kinase alpha-5                                         | O75582     | RPS6KA5   | CHEMBL4237    | <div><div></div></div> | 0 / 3                  | Ser_Thr Kinase          |
| Ribosomal protein S6 kinase alpha-4 ( <i>by homology</i> )                  | O75676     | RPS6KA4   | CHEMBL3125    | <div><div></div></div> | 0 / 3                  | Ser_Thr Kinase          |
| Ribosomal protein S6 kinase alpha-3 ( <i>by homology</i> )                  | P51812     | RPS6KA3   | CHEMBL2345    | <div><div></div></div> | 0 / 3                  | Ser_Thr Kinase          |

# SwissTargetPrediction report:

## Reference:

Gfeller D., Michielin O. & Zoete V.  
Shaping the interaction landscape of  
bioactive molecules, *Bioinformatics*  
(2013) 29:3073-3079.

## Query Molecule

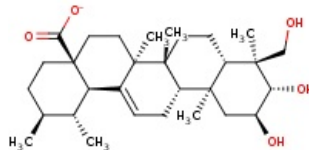

## Frequency of Target Class

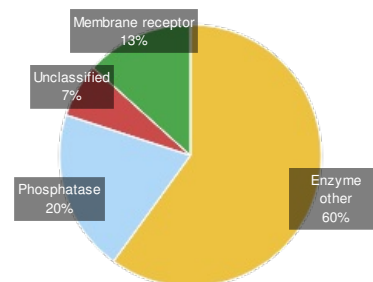

| Target                                                            | Uniprot ID | Gene code | ChEMBL ID     | Probability            | # sim. cmpds (3D / 2D) | Target Class      |
|-------------------------------------------------------------------|------------|-----------|---------------|------------------------|------------------------|-------------------|
| Aldo-keto reductase family 1 member B10                           | O60218     | AKR1B10   | CHEMBL5983    | <div><div></div></div> | 6 / 7                  | Enzyme            |
| Aldose reductase (by homology)                                    | P15121     | AKR1B1    | CHEMBL1900    | <div><div></div></div> | 6 / 7                  | Enzyme            |
| Aldo-keto reductase family 1 member B15 (by homology)             | C9JRZ8     | AKR1B15   |               | <div><div></div></div> | 6 / 7                  | Enzyme            |
| Alcohol dehydrogenase [NADP(+)] (by homology)                     | P14550     | AKR1A1    | CHEMBL2246    | <div><div></div></div> | 6 / 7                  | Enzyme            |
| 1,5-anhydro-D-fructose reductase (by homology)                    | Q96JD6     | AKR1E2    |               | <div><div></div></div> | 6 / 7                  | Enzyme            |
| Tyrosine-protein phosphatase non-receptor type 2 (by homology)    | P17706     | PTPN2     | CHEMBL3807    | <div><div></div></div> | 16 / 50                | Tyr Phosphatase   |
| Tyrosine-protein phosphatase non-receptor type 1                  | P18031     | PTPN1     | CHEMBL335     | <div><div></div></div> | 16 / 50                | Tyr Phosphatase   |
| Corticosteroid 11-beta-dehydrogenase isozyme 1                    | P28845     | HSD11B1   | CHEMBL4235    | <div><div></div></div> | 6 / 23                 | Enzyme            |
| Hydroxysteroid 11-beta-dehydrogenase 1-like protein (by homology) | Q7Z5J1     | HSD11B1L  |               | <div><div></div></div> | 6 / 23                 | Enzyme            |
| Tyrosyl-DNA phosphodiesterase 1                                   | Q9NUW8     | TDP1      | CHEMBL1075138 | <div><div></div></div> | 5 / 15                 | Enzyme            |
| Microtubule-associated protein tau                                | P10636     | MAPT      | CHEMBL1293224 | <div><div></div></div> | 10 / 19                | Unclassified      |
| DNA polymerase beta                                               | P06746     | POLB      | CHEMBL2392    | <div><div></div></div> | 6 / 17                 | Enzyme            |
| Receptor-type tyrosine-protein phosphatase F                      | P10586     | PTPRF     | CHEMBL3521    | <div><div></div></div> | 1 / 1                  | Membrane receptor |
| Low molecular weight phosphotyrosine protein phosphatase          | P24666     | ACP1      | CHEMBL4903    | <div><div></div></div> | 1 / 1                  | Tyr Phosphatase   |
| Receptor-type tyrosine-protein phosphatase delta (by homology)    | P23468     | PTPRD     |               | <div><div></div></div> | 1 / 1                  | Membrane receptor |

# SwissTargetPrediction report:

## Reference:

Gfeller D., Michielin O. & Zoete V.  
 Shaping the interaction landscape of  
 bioactive molecules, *Bioinformatics*  
 (2013) 29:3073-3079.

## Query Molecule

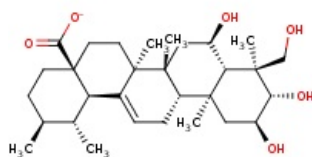

## Frequency of Target Class

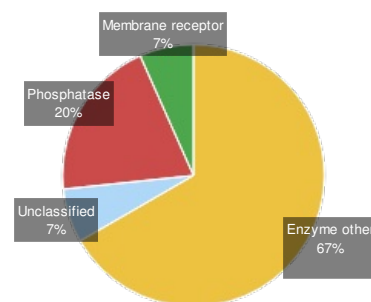

| Target                                                                     | Uniprot ID | Gene code | ChEMBL ID     | Probability            | # sim. cmpds (3D / 2D) | Target Class      |
|----------------------------------------------------------------------------|------------|-----------|---------------|------------------------|------------------------|-------------------|
| Aldo-keto reductase family 1 member B10                                    | O60218     | AKR1B10   | CHEMBL5983    | <div><div></div></div> | 7 / 6                  | Enzyme            |
| Aldose reductase ( <i>by homology</i> )                                    | P15121     | AKR1B1    | CHEMBL1900    | <div><div></div></div> | 7 / 6                  | Enzyme            |
| Aldo-keto reductase family 1 member B15 ( <i>by homology</i> )             | C9JRZ8     | AKR1B15   |               | <div><div></div></div> | 7 / 6                  | Enzyme            |
| Alcohol dehydrogenase [NADP(+)] ( <i>by homology</i> )                     | P14550     | AKR1A1    | CHEMBL2246    | <div><div></div></div> | 6 / 6                  | Enzyme            |
| 1,5-anhydro-D-fructose reductase ( <i>by homology</i> )                    | Q96JD6     | AKR1E2    |               | <div><div></div></div> | 6 / 6                  | Enzyme            |
| Microtubule-associated protein tau                                         | P10636     | MAPT      | CHEMBL1293224 | <div><div></div></div> | 10 / 22                | Unclassified      |
| Tyrosyl-DNA phosphodiesterase 1                                            | Q9NUW8     | TDP1      | CHEMBL1075138 | <div><div></div></div> | 3 / 12                 | Enzyme            |
| Tyrosine-protein phosphatase non-receptor type 2 ( <i>by homology</i> )    | P17706     | PTPN2     | CHEMBL3807    | <div><div></div></div> | 14 / 50                | Tyr Phosphatase   |
| Tyrosine-protein phosphatase non-receptor type 1                           | P18031     | PTPN1     | CHEMBL335     | <div><div></div></div> | 14 / 50                | Tyr Phosphatase   |
| Corticosteroid 11-beta-dehydrogenase isozyme 1                             | P28845     | HSD11B1   | CHEMBL4235    | <div><div></div></div> | 6 / 23                 | Enzyme            |
| Hydroxysteroid 11-beta-dehydrogenase 1-like protein ( <i>by homology</i> ) | Q7Z5J1     | HSD11B1L  |               | <div><div></div></div> | 6 / 23                 | Enzyme            |
| Phospholipase A2                                                           | P04054     | PLA2G1B   | CHEMBL4426    | <div><div></div></div> | 1 / 1                  | Enzyme            |
| DNA polymerase beta                                                        | P06746     | POLB      | CHEMBL2392    | <div><div></div></div> | 6 / 16                 | Enzyme            |
| Receptor-type tyrosine-protein phosphatase F                               | P10586     | PTPRF     | CHEMBL3521    | <div><div></div></div> | 2 / 1                  | Membrane receptor |
| Low molecular weight phosphotyrosine protein phosphatase                   | P24666     | ACP1      | CHEMBL4903    | <div><div></div></div> | 1 / 1                  | Tyr Phosphatase   |

# SwissTargetPrediction report:

## Reference:

Gfeller D., Michielin O. & Zoete V.  
 Shaping the interaction landscape of  
 bioactive molecules, *Bioinformatics*  
 (2013) 29:3073-3079.

## Query Molecule

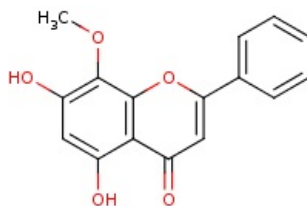

## Frequency of Target Class

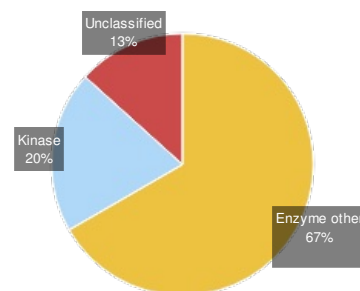

| Target                                                                               | Uniprot ID | Gene code | ChEMBL ID     | Probability            | # sim. cmpds (3D / 2D) | Target Class       |
|--------------------------------------------------------------------------------------|------------|-----------|---------------|------------------------|------------------------|--------------------|
| Prostaglandin G/H synthase 1 ( <i>by homology</i> )                                  | P23219     | PTGS1     | CHEMBL221     | <div><div></div></div> | 14 / 37                | Enzyme             |
| Nitric oxide synthase, inducible ( <i>by homology</i> )                              | P35228     | NOS2      | CHEMBL4481    | <div><div></div></div> | 6 / 3                  | Enzyme             |
| Prostaglandin G/H synthase 2 ( <i>by homology</i> )                                  | P35354     | PTGS2     | CHEMBL230     | <div><div></div></div> | 14 / 37                | Enzyme             |
| Nitric oxide synthase, endothelial ( <i>by homology</i> )                            | P29474     | NOS3      | CHEMBL4803    | <div><div></div></div> | 6 / 3                  | Enzyme             |
| Nitric oxide synthase, brain ( <i>by homology</i> )                                  | P29475     | NOS1      | CHEMBL3568    | <div><div></div></div> | 6 / 3                  | Enzyme             |
| Aldose reductase ( <i>by homology</i> )                                              | P15121     | AKR1B1    | CHEMBL1900    | <div><div></div></div> | 20 / 68                | Enzyme             |
| Aldo-keto reductase family 1 member B15 ( <i>by homology</i> )                       | C9JRZ8     | AKR1B15   |               | <div><div></div></div> | 20 / 68                | Enzyme             |
| Aldo-keto reductase family 1 member B10 ( <i>by homology</i> )                       | O60218     | AKR1B10   | CHEMBL5983    | <div><div></div></div> | 20 / 68                | Enzyme             |
| Inhibitor of nuclear factor kappa-B kinase subunit beta                              | O14920     | IKBKB     | CHEMBL1991    | <div><div></div></div> | 14 / 1                 | Ser_Thr Kinase     |
| Inhibitor of nuclear factor kappa-B kinase subunit alpha ( <i>by homology</i> )      | O15111     | CHUK      | CHEMBL3476    | <div><div></div></div> | 14 / 1                 | Ser_Thr Kinase     |
| Dual specificity tyrosine-phosphorylation-regulated kinase 1A ( <i>by homology</i> ) | Q13627     | DYRK1A    | CHEMBL2292    | <div><div></div></div> | 40 / 21                | Ser_Thr_Tyr Kinase |
| Microtubule-associated protein tau                                                   | P10636     | MAPT      | CHEMBL1293224 | <div><div></div></div> | 254 / 83               | Unclassified       |
| ATP-binding cassette sub-family G member 2                                           | Q9UNQ0     | ABCG2     | CHEMBL5393    | <div><div></div></div> | 8 / 20                 | Unclassified       |
| Tyrosyl-DNA phosphodiesterase 1                                                      | Q9NUW8     | TDP1      | CHEMBL1075138 | <div><div></div></div> | 70 / 24                | Enzyme             |
| Arachidonate 5-lipoxygenase                                                          | P09917     | ALOX5     | CHEMBL215     | <div><div></div></div> | 27 / 53                | Enzyme             |

# SwissTargetPrediction report:

## Reference:

Gfeller D., Michielin O. & Zoete V.  
 Shaping the interaction landscape of  
 bioactive molecules, *Bioinformatics*  
 (2013) 29:3073-3079.

## Query Molecule

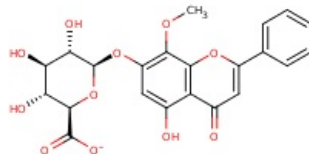

## Frequency of Target Class

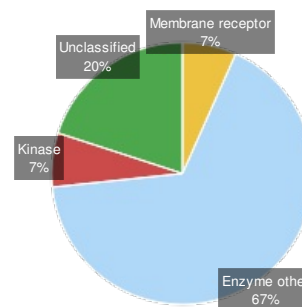

| Target                                                                               | Uniprot ID | Gene code | ChEMBL ID     | Probability            | # sim. cmpds (3D / 2D) | Target Class       |
|--------------------------------------------------------------------------------------|------------|-----------|---------------|------------------------|------------------------|--------------------|
| Adenosine receptor A1 ( <i>by homology</i> )                                         | P30542     | ADORA1    | CHEMBL226     | <div><div></div></div> | 20 / 10                | Membrane receptor  |
| Aldose reductase ( <i>by homology</i> )                                              | P15121     | AKR1B1    | CHEMBL1900    | <div><div></div></div> | 1 / 56                 | Enzyme             |
| Aldo-keto reductase family 1 member B15 ( <i>by homology</i> )                       | C9JRZ8     | AKR1B15   |               | <div><div></div></div> | 1 / 56                 | Enzyme             |
| Aldo-keto reductase family 1 member B10 ( <i>by homology</i> )                       | O60218     | AKR1B10   | CHEMBL5983    | <div><div></div></div> | 1 / 56                 | Enzyme             |
| Tyrosyl-DNA phosphodiesterase 1                                                      | Q9NUW8     | TDP1      | CHEMBL1075138 | <div><div></div></div> | 3 / 11                 | Enzyme             |
| Dual specificity tyrosine-phosphorylation-regulated kinase 1A ( <i>by homology</i> ) | Q13627     | DYRK1A    | CHEMBL2292    | <div><div></div></div> | 1 / 12                 | Ser_Thr_Tyr Kinase |
| Muscleblind-like protein 1                                                           | Q9NR56     | MBNL1     | CHEMBL1293317 | <div><div></div></div> | 1 / 4                  | Unclassified       |
| Muscleblind-like protein 2 ( <i>by homology</i> )                                    | Q5VZF2     | MBNL2     |               | <div><div></div></div> | 1 / 4                  | Unclassified       |
| Muscleblind-like protein 3 ( <i>by homology</i> )                                    | Q9NUK0     | MBNL3     |               | <div><div></div></div> | 1 / 4                  | Unclassified       |
| Xanthine dehydrogenase/oxidase                                                       | P47989     | XDH       | CHEMBL1929    | <div><div></div></div> | 0 / 9                  | Enzyme             |
| Aldehyde oxidase ( <i>by homology</i> )                                              | Q06278     | AOX1      | CHEMBL3257    | <div><div></div></div> | 0 / 9                  | Enzyme             |
| Lysine-specific demethylase 4A                                                       | O75164     | KDM4A     | CHEMBL5896    | <div><div></div></div> | 0 / 3                  | Enzyme             |
| Lysine-specific demethylase 4B ( <i>by homology</i> )                                | O94953     | KDM4B     |               | <div><div></div></div> | 0 / 3                  | Enzyme             |
| Lysine-specific demethylase 4C ( <i>by homology</i> )                                | Q9H3R0     | KDM4C     | CHEMBL6175    | <div><div></div></div> | 0 / 3                  | Enzyme             |
| Prostaglandin G/H synthase 2                                                         | P35354     | PTGS2     | CHEMBL230     | <div><div></div></div> | 0 / 5                  | Enzyme             |

# SwissTargetPrediction report:

## Reference:

Gfeller D., Michielin O. & Zoete V.  
 Shaping the interaction landscape of  
 bioactive molecules, *Bioinformatics*  
 (2013) 29:3073-3079.

## Query Molecule

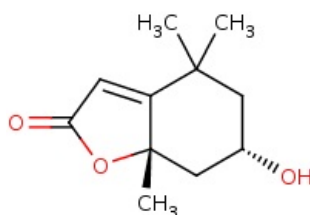

## Frequency of Target Class

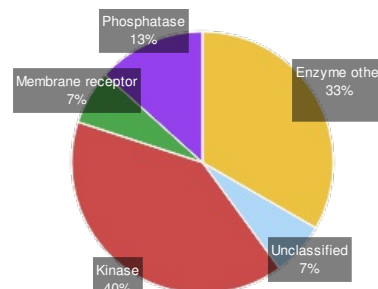

| Target                                                     | Uniprot ID | Gene code | ChEMBL ID     | Probability            | # sim. cmpds (3D / 2D) | Target Class            |
|------------------------------------------------------------|------------|-----------|---------------|------------------------|------------------------|-------------------------|
| Tyrosyl-DNA phosphodiesterase 1                            | Q9NUW8     | TDP1      | CHEMBL1075138 | <div><div></div></div> | 24 / 5                 | Enzyme                  |
| Microtubule-associated protein tau                         | P10636     | MAPT      | CHEMBL1293224 | <div><div></div></div> | 44 / 21                | Unclassified            |
| Quinone oxidoreductase ( <i>by homology</i> )              | Q08257     | CRYZ      | CHEMBL6118    | <div><div></div></div> | 1 / 21                 | Enzyme                  |
| Ribosomal protein S6 kinase alpha-5                        | O75582     | RPS6KA5   | CHEMBL4237    | <div><div></div></div> | 1 / 4                  | Ser_Thr Kinase          |
| Ribosomal protein S6 kinase alpha-4 ( <i>by homology</i> ) | O75676     | RPS6KA4   | CHEMBL3125    | <div><div></div></div> | 1 / 4                  | Ser_Thr Kinase          |
| Ribosomal protein S6 kinase alpha-3 ( <i>by homology</i> ) | P51812     | RPS6KA3   | CHEMBL2345    | <div><div></div></div> | 1 / 4                  | Ser_Thr Kinase          |
| Ribosomal protein S6 kinase alpha-2 ( <i>by homology</i> ) | Q15349     | RPS6KA2   | CHEMBL3906    | <div><div></div></div> | 1 / 4                  | Ser_Thr Kinase          |
| Ribosomal protein S6 kinase alpha-1 ( <i>by homology</i> ) | Q15418     | RPS6KA1   | CHEMBL2553    | <div><div></div></div> | 1 / 4                  | Ser_Thr Kinase          |
| Ribosomal protein S6 kinase alpha-6 ( <i>by homology</i> ) | Q9UK32     | RPS6KA6   | CHEMBL4924    | <div><div></div></div> | 1 / 4                  | Ser_Thr Kinase          |
| Prostaglandin G/H synthase 1 ( <i>by homology</i> )        | P23219     | PTGS1     | CHEMBL221     | <div><div></div></div> | 3 / 11                 | Enzyme                  |
| Prostaglandin G/H synthase 2                               | P35354     | PTGS2     | CHEMBL230     | <div><div></div></div> | 3 / 11                 | Enzyme                  |
| Platelet-activating factor receptor                        | P25105     | PTAFR     | CHEMBL250     | <div><div></div></div> | 14 / 19                | Membrane receptor       |
| M-phase inducer phosphatase 1                              | P30304     | CDC25A    | CHEMBL3775    | <div><div></div></div> | 1 / 17                 | Ser_Thr_Tyr Phosphatase |
| M-phase inducer phosphatase 2                              | P30305     | CDC25B    | CHEMBL4804    | <div><div></div></div> | 1 / 17                 | Ser_Thr_Tyr Phosphatase |
| Cytochrome P450 19A1                                       | P11511     | CYP19A1   | CHEMBL1978    | <div><div></div></div> | 23 / 22                | Enzyme                  |

# SwissTargetPrediction report:

## Reference:

Gfeller D., Michielin O. & Zoete V.  
 Shaping the interaction landscape of  
 bioactive molecules, *Bioinformatics*  
 (2013) 29:3073-3079.

## Query Molecule

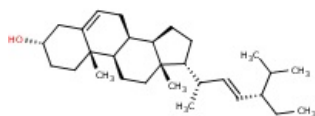

## Frequency of Target Class

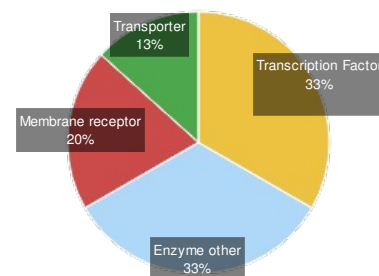

| Target                                                           | Uniprot ID | Gene code | ChEMBL ID     | Probability            | # sim. cmpds (3D / 2D) | Target Class         |
|------------------------------------------------------------------|------------|-----------|---------------|------------------------|------------------------|----------------------|
| Androgen receptor                                                | P10275     | AR        | CHEMBL1871    | <div><div></div></div> | 13 / 90                | Transcription Factor |
| Tyrosyl-DNA phosphodiesterase 1                                  | Q9NUW8     | TDP1      | CHEMBL1075138 | <div><div></div></div> | 5 / 14                 | Enzyme               |
| Cytochrome P450 19A1                                             | P11511     | CYP19A1   | CHEMBL1978    | <div><div></div></div> | 4 / 135                | Enzyme               |
| 3-hydroxy-3-methylglutaryl-coenzyme A reductase                  | P04035     | HMGCR     | CHEMBL402     | <div><div></div></div> | 24 / 33                | Enzyme               |
| Lanosterol 14-alpha demethylase (by homology)                    | Q16850     | CYP51A1   | CHEMBL3849    | <div><div></div></div> | 2 / 2                  | Enzyme               |
| Oxysterols receptor LXR-beta (by homology)                       | P55055     | NR1H2     | CHEMBL4093    | <div><div></div></div> | 8 / 23                 | Transcription Factor |
| Oxysterols receptor LXR-alpha                                    | Q13133     | NR1H3     | CHEMBL2808    | <div><div></div></div> | 8 / 23                 | Transcription Factor |
| Low-density lipoprotein receptor                                 | P01130     | LDLR      | CHEMBL3311    | <div><div></div></div> | 10 / 10                | Membrane receptor    |
| Very low-density lipoprotein receptor (by homology)              | P98155     | VLDLR     |               | <div><div></div></div> | 10 / 10                | Membrane receptor    |
| Low-density lipoprotein receptor-related protein 8 (by homology) | Q14114     | LRP8      |               | <div><div></div></div> | 10 / 10                | Membrane receptor    |
| Steroid 17-alpha-hydroxylase/17,20 lyase                         | P05093     | CYP17A1   | CHEMBL3522    | <div><div></div></div> | 21 / 56                | Enzyme               |
| Estrogen receptor                                                | P03372     | ESR1      | CHEMBL206     | <div><div></div></div> | 1 / 52                 | Transcription Factor |
| Estrogen receptor beta                                           | Q92731     | ESR2      | CHEMBL242     | <div><div></div></div> | 1 / 52                 | Transcription Factor |
| Sodium-dependent noradrenaline transporter                       | P23975     | SLC6A2    | CHEMBL222     | <div><div></div></div> | 37 / 6                 | Transporter          |
| Sodium-dependent dopamine transporter (by homology)              | Q01959     | SLC6A3    | CHEMBL238     | <div><div></div></div> | 37 / 6                 | Transporter          |

# SwissTargetPrediction report:

## Reference:

Gfeller D., Michielin O. & Zoete V.  
Shaping the interaction landscape of  
bioactive molecules, *Bioinformatics*  
(2013) 29:3073-3079.

## Query Molecule

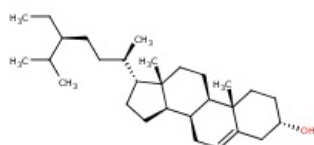

## Frequency of Target Class

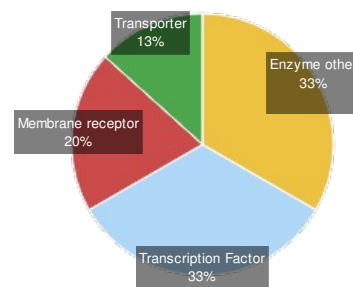

| Target                                                              | Uniprot ID | Gene code | ChEMBL ID     | Probability            | # sim. cmpds (3D / 2D) | Target Class         |
|---------------------------------------------------------------------|------------|-----------|---------------|------------------------|------------------------|----------------------|
| Tyrosyl-DNA phosphodiesterase 1                                     | Q9NUW8     | TDP1      | CHEMBL1075138 | <div><div></div></div> | 4 / 14                 | Enzyme               |
| Androgen receptor                                                   | P10275     | AR        | CHEMBL1871    | <div><div></div></div> | 10 / 90                | Transcription Factor |
| 3-hydroxy-3-methylglutaryl-coenzyme A reductase                     | P04035     | HMGCR     | CHEMBL402     | <div><div></div></div> | 16 / 33                | Enzyme               |
| Lanosterol 14-alpha demethylase<br>(by homology)                    | Q16850     | CYP51A1   | CHEMBL3849    | <div><div></div></div> | 2 / 2                  | Enzyme               |
| Oxysterols receptor LXR-beta (by homology)                          | P55055     | NR1H2     | CHEMBL4093    | <div><div></div></div> | 13 / 23                | Transcription Factor |
| Oxysterols receptor LXR-alpha                                       | Q13133     | NR1H3     | CHEMBL2808    | <div><div></div></div> | 13 / 23                | Transcription Factor |
| Cytochrome P450 19A1                                                | P11511     | CYP19A1   | CHEMBL1978    | <div><div></div></div> | 5 / 135                | Enzyme               |
| Steroid 17-alpha-hydroxylase/17,20 lyase                            | P05093     | CYP17A1   | CHEMBL3522    | <div><div></div></div> | 17 / 56                | Enzyme               |
| Low-density lipoprotein receptor                                    | P01130     | LDLR      | CHEMBL3311    | <div><div></div></div> | 10 / 10                | Membrane receptor    |
| Very low-density lipoprotein receptor<br>(by homology)              | P98155     | VLDLR     |               | <div><div></div></div> | 10 / 10                | Membrane receptor    |
| Low-density lipoprotein receptor-related protein 8<br>(by homology) | Q14114     | LRP8      |               | <div><div></div></div> | 10 / 10                | Membrane receptor    |
| Estrogen receptor                                                   | P03372     | ESR1      | CHEMBL206     | <div><div></div></div> | 3 / 52                 | Transcription Factor |
| Estrogen receptor beta                                              | Q92731     | ESR2      | CHEMBL242     | <div><div></div></div> | 3 / 52                 | Transcription Factor |
| Sodium-dependent noradrenaline transporter                          | P23975     | SLC6A2    | CHEMBL222     | <div><div></div></div> | 38 / 6                 | Transporter          |
| Sodium-dependent serotonin transporter                              | P31645     | SLC6A4    | CHEMBL228     | <div><div></div></div> | 40 / 6                 | Transporter          |



# SwissTargetPrediction report:

## Reference:

Gfeller D., Michielin O. & Zoete V.  
Shaping the interaction landscape of  
bioactive molecules, *Bioinformatics*  
(2013) 29:3073-3079.

## Query Molecule

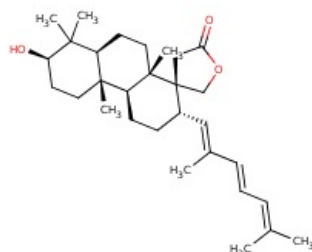

## Frequency of Target Class

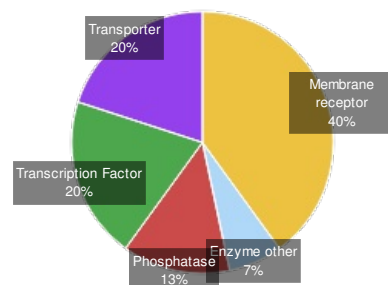

| Target                                                         | Uniprot ID | Gene code | ChEMBL ID  | Probability            | # sim. cmpds (3D / 2D) | Target Class         |
|----------------------------------------------------------------|------------|-----------|------------|------------------------|------------------------|----------------------|
| D(2) dopamine receptor                                         | P14416     | DRD2      | CHEMBL217  | <div><div></div></div> | 11 / 1                 | Membrane receptor    |
| D(3) dopamine receptor                                         | P35462     | DRD3      | CHEMBL234  | <div><div></div></div> | 8 / 1                  | Membrane receptor    |
| 3-hydroxy-3-methylglutaryl-coenzyme A reductase                | P04035     | HMGCR     | CHEMBL402  | <div><div></div></div> | 7 / 98                 | Enzyme               |
| 5-hydroxytryptamine receptor 1A                                | P08908     | HTR1A     | CHEMBL214  | <div><div></div></div> | 7 / 1                  | Membrane receptor    |
| 5-hydroxytryptamine receptor 1B (by homology)                  | P28222     | HTR1B     | CHEMBL1898 | <div><div></div></div> | 7 / 1                  | Membrane receptor    |
| Tyrosine-protein phosphatase non-receptor type 2 (by homology) | P17706     | PTPN2     | CHEMBL3807 | <div><div></div></div> | 5 / 48                 | Tyr Phosphatase      |
| Tyrosine-protein phosphatase non-receptor type 1               | P18031     | PTPN1     | CHEMBL335  | <div><div></div></div> | 5 / 48                 | Tyr Phosphatase      |
| Glucocorticoid receptor                                        | P04150     | NR3C1     | CHEMBL2034 | <div><div></div></div> | 7 / 18                 | Transcription Factor |
| Mineralocorticoid receptor (by homology)                       | P08235     | NR3C2     | CHEMBL1994 | <div><div></div></div> | 7 / 20                 | Transcription Factor |
| Androgen receptor (by homology)                                | P10275     | AR        | CHEMBL1871 | <div><div></div></div> | 17 / 29                | Transcription Factor |
| Sodium-dependent noradrenaline transporter                     | P23975     | SLC6A2    | CHEMBL222  | <div><div></div></div> | 8 / 2                  | Transporter          |
| Substance-P receptor (by homology)                             | P25103     | TACR1     | CHEMBL249  | <div><div></div></div> | 29 / 1                 | Membrane receptor    |
| Sodium-dependent serotonin transporter                         | P31645     | SLC6A4    | CHEMBL228  | <div><div></div></div> | 11 / 2                 | Transporter          |
| Sodium-dependent dopamine transporter                          | Q01959     | SLC6A3    | CHEMBL238  | <div><div></div></div> | 8 / 2                  | Transporter          |
| Neuromedin-K receptor (by homology)                            | P29371     | TACR3     | CHEMBL4429 | <div><div></div></div> | 29 / 1                 | Membrane receptor    |

# SwissTargetPrediction report:

## Reference:

Gfeller D., Michielin O. & Zoete V.  
 Shaping the interaction landscape of  
 bioactive molecules, *Bioinformatics*  
 (2013) 29:3073-3079.

## Query Molecule

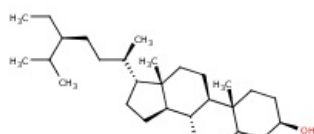

## Frequency of Target Class

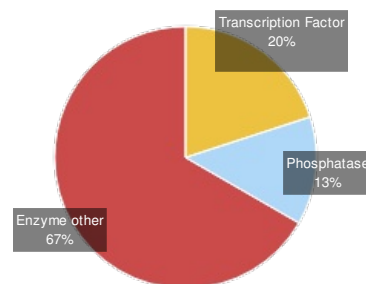

| Target                                         | Uniprot ID | Gene code | ChEMBL ID     | Probability            | # sim. cmpds (3D / 2D) | Target Class            |
|------------------------------------------------|------------|-----------|---------------|------------------------|------------------------|-------------------------|
| Androgen receptor                              | P10275     | AR        | CHEMBL1871    | <div><div></div></div> | 11 / 14                | Transcription Factor    |
| M-phase inducer phosphatase 1                  | P30304     | CDC25A    | CHEMBL3775    | <div><div></div></div> | 5 / 8                  | Ser_Thr_Tyr Phosphatase |
| M-phase inducer phosphatase 2                  | P30305     | CDC25B    | CHEMBL4804    | <div><div></div></div> | 5 / 8                  | Ser_Thr_Tyr Phosphatase |
| UDP-glucuronosyltransferase 1-4                | P22310     | UGT1A4    | CHEMBL3619    | <div><div></div></div> | 1 / 1                  | Enzyme                  |
| UDP-glucuronosyltransferase 1-9 (by homology)  | O60656     | UGT1A9    | CHEMBL1743319 | <div><div></div></div> | 1 / 1                  | Enzyme                  |
| UDP-glucuronosyltransferase 1-6 (by homology)  | P19224     | UGT1A6    | CHEMBL1743316 | <div><div></div></div> | 1 / 1                  | Enzyme                  |
| UDP-glucuronosyltransferase 1-1 (by homology)  | P22309     | UGT1A1    | CHEMBL1287617 | <div><div></div></div> | 1 / 1                  | Enzyme                  |
| UDP-glucuronosyltransferase 1-3 (by homology)  | P35503     | UGT1A3    |               | <div><div></div></div> | 1 / 1                  | Enzyme                  |
| UDP-glucuronosyltransferase 1-5 (by homology)  | P35504     | UGT1A5    |               | <div><div></div></div> | 1 / 1                  | Enzyme                  |
| UDP-glucuronosyltransferase 1-7 (by homology)  | Q9HAW7     | UGT1A7    | CHEMBL1743317 | <div><div></div></div> | 1 / 1                  | Enzyme                  |
| UDP-glucuronosyltransferase 1-10 (by homology) | Q9HAW8     | UGT1A10   | CHEMBL1743320 | <div><div></div></div> | 1 / 1                  | Enzyme                  |
| UDP-glucuronosyltransferase 1-8 (by homology)  | Q9HAW9     | UGT1A8    | CHEMBL1743318 | <div><div></div></div> | 1 / 1                  | Enzyme                  |
| Estrogen receptor                              | P03372     | ESR1      | CHEMBL206     | <div><div></div></div> | 3 / 2                  | Transcription Factor    |
| Estrogen receptor beta                         | Q92731     | ESR2      | CHEMBL242     | <div><div></div></div> | 3 / 2                  | Transcription Factor    |
| Carbonic anhydrase 1                           | P00915     | CA1       | CHEMBL261     | <div><div></div></div> | 23 / 2                 | Enzyme                  |

# SwissTargetPrediction report:

## Reference:

Gfeller D., Michielin O. & Zoete V.  
 Shaping the interaction landscape of  
 bioactive molecules, *Bioinformatics*  
 (2013) 29:3073-3079.

## Query Molecule

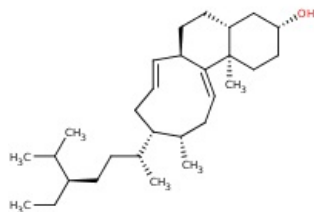

## Frequency of Target Class

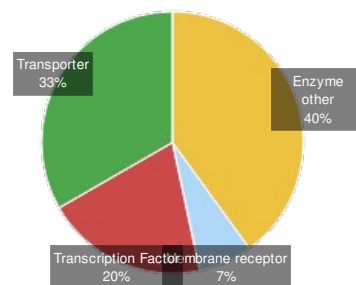

| Target                                                             | Uniprot ID | Gene code | ChEMBL ID     | Probability            | # sim. cmpds (3D / 2D) | Target Class         |
|--------------------------------------------------------------------|------------|-----------|---------------|------------------------|------------------------|----------------------|
| Tyrosyl-DNA phosphodiesterase 1                                    | Q9NUW8     | TDP1      | CHEMBL1075138 | <div><div></div></div> | 4 / 12                 | Enzyme               |
| Cannabinoid receptor 1 (by homology)                               | P21554     | CNR1      | CHEMBL218     | <div><div></div></div> | 78 / 26                | Membrane receptor    |
| Androgen receptor                                                  | P10275     | AR        | CHEMBL1871    | <div><div></div></div> | 5 / 77                 | Transcription Factor |
| Sodium-dependent noradrenaline transporter                         | P23975     | SLC6A2    | CHEMBL222     | <div><div></div></div> | 17 / 6                 | Transporter          |
| Sodium-dependent serotonin transporter                             | P31645     | SLC6A4    | CHEMBL228     | <div><div></div></div> | 20 / 6                 | Transporter          |
| Sodium-dependent dopamine transporter (by homology)                | Q01959     | SLC6A3    | CHEMBL238     | <div><div></div></div> | 17 / 6                 | Transporter          |
| Steroid 17-alpha-hydroxylase/17,20 lyase                           | P05093     | CYP17A1   | CHEMBL3522    | <div><div></div></div> | 2 / 32                 | Enzyme               |
| 3-hydroxy-3-methylglutaryl-coenzyme A reductase                    | P04035     | HMGCR     | CHEMBL402     | <div><div></div></div> | 16 / 3                 | Enzyme               |
| Oxysterols receptor LXR-beta                                       | P55055     | NR1H2     | CHEMBL4093    | <div><div></div></div> | 17 / 23                | Transcription Factor |
| Oxysterols receptor LXR-alpha                                      | Q13133     | NR1H3     | CHEMBL2808    | <div><div></div></div> | 17 / 23                | Transcription Factor |
| Cholinesterase (by homology)                                       | P06276     | BCHE      | CHEMBL1914    | <div><div></div></div> | 12 / 1                 | Enzyme               |
| Acetylcholinesterase                                               | P22303     | ACHE      | CHEMBL220     | <div><div></div></div> | 12 / 1                 | Enzyme               |
| Lanosterol 14-alpha demethylase (by homology)                      | Q16850     | CYP51A1   | CHEMBL3849    | <div><div></div></div> | 2 / 2                  | Enzyme               |
| Sodium- and chloride-dependent glycine transporter 1 (by homology) | P48067     | SLC6A9    | CHEMBL2337    | <div><div></div></div> | 5 / 6                  | Transporter          |
| Sodium- and chloride-dependent glycine transporter 2 (by homology) | Q9Y345     | SLC6A5    | CHEMBL3060    | <div><div></div></div> | 5 / 6                  | Transporter          |

# SwissTargetPrediction report:

## Reference:

Gfeller D., Michielin O. & Zoete V.  
 Shaping the interaction landscape of  
 bioactive molecules, *Bioinformatics*  
 (2013) 29:3073-3079.

## Query Molecule

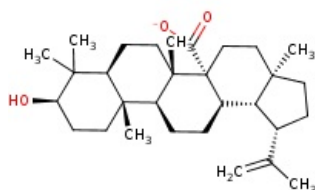

## Frequency of Target Class

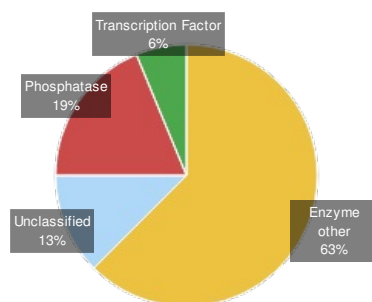

| Target                                                                     | Uniprot ID    | Gene code | ChEMBL ID     | Probability            | # sim. cmpds (3D / 2D) | Target Class            |
|----------------------------------------------------------------------------|---------------|-----------|---------------|------------------------|------------------------|-------------------------|
| DNA polymerase beta ( <i>by homology</i> )                                 | P06746        | POLB      | CHEMBL2392    | <div><div></div></div> | 5 / 12                 | Enzyme                  |
| Aldo-keto reductase family 1 member B10                                    | O60218        | AKR1B10   | CHEMBL5983    | <div><div></div></div> | 3 / 8                  | Enzyme                  |
| Aldose reductase ( <i>by homology</i> )                                    | P15121        | AKR1B1    | CHEMBL1900    | <div><div></div></div> | 3 / 8                  | Enzyme                  |
| Complex                                                                    | Q9UBE0/Q9UBT2 | SAE1/UBA2 | CHEMBL2095174 | <div><div></div></div> | 1 / 1                  | Unclassified /Enzyme    |
| Aldo-keto reductase family 1 member B15 ( <i>by homology</i> )             | C9JRZ8        | AKR1B15   |               | <div><div></div></div> | 3 / 8                  | Enzyme                  |
| Alcohol dehydrogenase [NADP(+)] ( <i>by homology</i> )                     | P14550        | AKR1A1    | CHEMBL2246    | <div><div></div></div> | 3 / 8                  | Enzyme                  |
| 1,5-anhydro-D-fructose reductase ( <i>by homology</i> )                    | Q96JD6        | AKR1E2    |               | <div><div></div></div> | 3 / 8                  | Enzyme                  |
| Microtubule-associated protein tau                                         | P10636        | MAPT      | CHEMBL1293224 | <div><div></div></div> | 2 / 17                 | Unclassified            |
| Corticosteroid 11-beta-dehydrogenase isozyme 1                             | P28845        | HSD11B1   | CHEMBL4235    | <div><div></div></div> | 5 / 14                 | Enzyme                  |
| Hydroxysteroid 11-beta-dehydrogenase 1-like protein ( <i>by homology</i> ) | Q7Z5J1        | HSD11B1L  |               | <div><div></div></div> | 5 / 14                 | Enzyme                  |
| Tyrosyl-DNA phosphodiesterase 1                                            | Q9NUW8        | TDP1      | CHEMBL1075138 | <div><div></div></div> | 1 / 17                 | Enzyme                  |
| Tyrosine-protein phosphatase non-receptor type 2                           | P17706        | PTPN2     | CHEMBL3807    | <div><div></div></div> | 10 / 32                | Tyr Phosphatase         |
| Tyrosine-protein phosphatase non-receptor type 1                           | P18031        | PTPN1     | CHEMBL335     | <div><div></div></div> | 10 / 32                | Tyr Phosphatase         |
| Bile acid receptor                                                         | Q96RI1        | NR1H4     | CHEMBL2047    | <div><div></div></div> | 0 / 13                 | Transcription Factor    |
| M-phase inducer phosphatase 1                                              | P30304        | CDC25A    | CHEMBL3775    | <div><div></div></div> | 5 / 19                 | Ser_Thr_Tyr Phosphatase |

# SwissTargetPrediction report:

## Reference:

Gfeller D., Michielin O. & Zoete V.  
Shaping the interaction landscape of  
bioactive molecules, *Bioinformatics*  
(2013) 29:3073-3079.

## Query Molecule

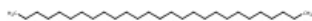

## Frequency of Target Class

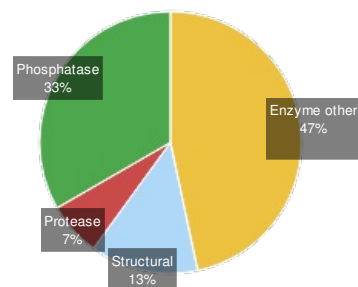

| Target                                                                   | Uniprot ID | Gene code | ChEMBL ID     | Probability            | # sim. cmpds (3D / 2D) | Target Class            |
|--------------------------------------------------------------------------|------------|-----------|---------------|------------------------|------------------------|-------------------------|
| Cocaine esterase                                                         | O00748     | CES2      | CHEMBL3180    | <div><div></div></div> | 0 / 6                  | Enzyme                  |
| Liver carboxylesterase 1                                                 | P23141     | CES1      | CHEMBL2265    | <div><div></div></div> | 0 / 6                  | Enzyme                  |
| Dynamin-1                                                                | Q05193     | DNM1      | CHEMBL4958    | <div><div></div></div> | 0 / 1                  | Structural              |
| Tyrosyl-DNA phosphodiesterase 1                                          | Q9NUW8     | TDP1      | CHEMBL1075138 | <div><div></div></div> | 0 / 1                  | Enzyme                  |
| N-acyl ethanolamine-hydrolyzing acid amidase subunit alpha (by homology) | Q02083     | NAAA      | CHEMBL4349    | <div><div></div></div> | 0 / 1                  | Enzyme                  |
| Carboxylesterase 5A (by homology)                                        | Q6NT32     | CES5A     |               | <div><div></div></div> | 0 / 6                  | Enzyme                  |
| Carboxylesterase 3 (by homology)                                         | Q6UWW8     | CES3      |               | <div><div></div></div> | 0 / 6                  | Enzyme                  |
| Dynamin-2 (by homology)                                                  | P50570     | DNM2      | CHEMBL5812    | <div><div></div></div> | 0 / 1                  | Enzyme                  |
| Dynamin-3 (by homology)                                                  | Q9UQ16     | DNM3      |               | <div><div></div></div> | 0 / 1                  | Structural              |
| Activation peptide fragment 1                                            | P00734     | F2        | CHEMBL204     | <div><div></div></div> | 1 / 0                  | Serine Protease         |
| Dual specificity protein phosphatase 3                                   | P51452     | DUSP3     | CHEMBL2635    | <div><div></div></div> | 2 / 0                  | Ser_Thr_Tyr Phosphatase |
| M-phase inducer phosphatase 1 (by homology)                              | P30304     | CDC25A    | CHEMBL3775    | <div><div></div></div> | 5 / 0                  | Ser_Thr_Tyr Phosphatase |
| M-phase inducer phosphatase 2 (by homology)                              | P30305     | CDC25B    | CHEMBL4804    | <div><div></div></div> | 5 / 0                  | Ser_Thr_Tyr Phosphatase |
| Inactive dual specificity phosphatase 27 (by homology)                   | Q5VZP5     | DUSP27    |               | <div><div></div></div> | 2 / 0                  | Ser_Thr_Tyr Phosphatase |
| Dual specificity phosphatase DUPD1 (by homology)                         | Q68J44     | DUPD1     |               | <div><div></div></div> | 2 / 0                  | Ser_Thr_Tyr Phosphatase |

# SwissTargetPrediction report:

## Reference:

Gfeller D., Michielin O. & Zoete V.  
Shaping the interaction landscape of  
bioactive molecules, *Bioinformatics*  
(2013) 29:3073-3079.

## Query Molecule

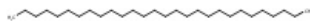

## Frequency of Target Class

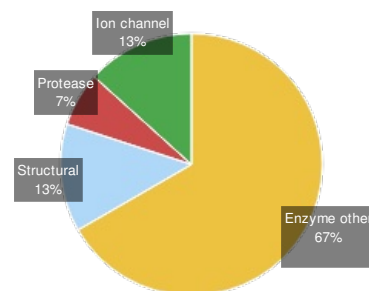

| Target                                                                            | Uniprot ID                    | Gene code                    | ChEMBL ID     | Probability            | # sim. cmpds (3D / 2D) | Target Class    |
|-----------------------------------------------------------------------------------|-------------------------------|------------------------------|---------------|------------------------|------------------------|-----------------|
| Cocaine esterase                                                                  | <a href="#">Q00748</a>        | <a href="#">CES2</a>         | CHEMBL3180    | <div><div></div></div> | 0 / 6                  | Enzyme          |
| Liver carboxylesterase 1                                                          | <a href="#">P23141</a>        | <a href="#">CES1</a>         | CHEMBL2265    | <div><div></div></div> | 0 / 6                  | Enzyme          |
| Dynamin-1                                                                         | <a href="#">Q05193</a>        | <a href="#">DNM1</a>         | CHEMBL4958    | <div><div></div></div> | 0 / 1                  | Structural      |
| Tyrosyl-DNA phosphodiesterase 1                                                   | <a href="#">Q9NUW8</a>        | <a href="#">TDP1</a>         | CHEMBL1075138 | <div><div></div></div> | 0 / 1                  | Enzyme          |
| N-acyl ethanolamine-hydrolyzing acid amidase subunit alpha ( <i>by homology</i> ) | <a href="#">Q02083</a>        | <a href="#">NAAA</a>         | CHEMBL4349    | <div><div></div></div> | 0 / 1                  | Enzyme          |
| Carboxylesterase 5A ( <i>by homology</i> )                                        | <a href="#">Q6NT32</a>        | <a href="#">CES5A</a>        |               | <div><div></div></div> | 0 / 6                  | Enzyme          |
| Carboxylesterase 3 ( <i>by homology</i> )                                         | <a href="#">Q6UWW8</a>        | <a href="#">CES3</a>         |               | <div><div></div></div> | 0 / 6                  | Enzyme          |
| Dynamin-2 ( <i>by homology</i> )                                                  | <a href="#">P50570</a>        | <a href="#">DNM2</a>         | CHEMBL5812    | <div><div></div></div> | 0 / 1                  | Enzyme          |
| Dynamin-3 ( <i>by homology</i> )                                                  | <a href="#">Q9UQ16</a>        | <a href="#">DNM3</a>         |               | <div><div></div></div> | 0 / 1                  | Structural      |
| Carbonic anhydrase 1                                                              | <a href="#">P00915</a>        | <a href="#">CA1</a>          | CHEMBL261     | <div><div></div></div> | 0 / 3                  | Enzyme          |
| Carbonic anhydrase 2                                                              | <a href="#">P00918</a>        | <a href="#">CA2</a>          | CHEMBL205     | <div><div></div></div> | 0 / 3                  | Enzyme          |
| Alpha-trypsin chain 1                                                             | <a href="#">P07477</a>        | <a href="#">PRSS1</a>        | CHEMBL209     | <div><div></div></div> | 0 / 1                  | Serine Protease |
| Carbonic anhydrase 4                                                              | <a href="#">P22748</a>        | <a href="#">CA4</a>          | CHEMBL3729    | <div><div></div></div> | 0 / 3                  | Enzyme          |
| Glutamate receptor ionotropic, NMDA 1                                             | <a href="#">Q05586</a>        | <a href="#">GRIN1</a>        | CHEMBL2015    | <div><div></div></div> | 0 / 1                  | Ion channel     |
| Complex                                                                           | <a href="#">Q05586/Q12879</a> | <a href="#">GRIN1/GRIN2A</a> | CHEMBL1907604 | <div><div></div></div> | 0 / 1                  | Ion channel     |

# SwissTargetPrediction report:

## Reference:

Gfeller D., Michielin O. & Zoete V.  
 Shaping the interaction landscape of  
 bioactive molecules, *Bioinformatics*  
 (2013) 29:3073-3079.

## Query Molecule

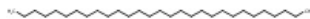

## Frequency of Target Class

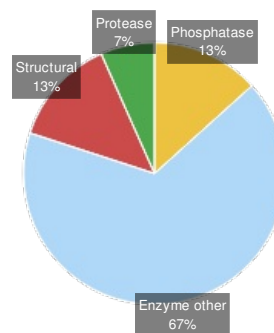

| Target                                                                  | Uniprot ID | Gene code | ChEMBL ID     | Probability            | # sim. cmpds (3D / 2D) | Target Class            |
|-------------------------------------------------------------------------|------------|-----------|---------------|------------------------|------------------------|-------------------------|
| M-phase inducer phosphatase 1<br>(by homology)                          | P30304     | CDC25A    | CHEMBL3775    | <div><div></div></div> | 1 / 0                  | Ser_Thr_Tyr Phosphatase |
| M-phase inducer phosphatase 2<br>(by homology)                          | P30305     | CDC25B    | CHEMBL4804    | <div><div></div></div> | 1 / 0                  | Ser_Thr_Tyr Phosphatase |
| Cocaine esterase                                                        | O00748     | CES2      | CHEMBL3180    | <div><div></div></div> | 0 / 6                  | Enzyme                  |
| Liver carboxylesterase 1                                                | P23141     | CES1      | CHEMBL2265    | <div><div></div></div> | 0 / 6                  | Enzyme                  |
| Dynamin-1                                                               | Q05193     | DNM1      | CHEMBL4958    | <div><div></div></div> | 0 / 1                  | Structural              |
| Tyrosyl-DNA phosphodiesterase 1                                         | Q9NUW8     | TDP1      | CHEMBL1075138 | <div><div></div></div> | 0 / 1                  | Enzyme                  |
| N-acylethanolamine-hydrolyzing acid amidase subunit alpha (by homology) | Q02083     | NAAA      | CHEMBL4349    | <div><div></div></div> | 0 / 1                  | Enzyme                  |
| Carboxylesterase 5A (by homology)                                       | Q6NT32     | CES5A     |               | <div><div></div></div> | 0 / 6                  | Enzyme                  |
| Carboxylesterase 3 (by homology)                                        | Q6UWW8     | CES3      |               | <div><div></div></div> | 0 / 6                  | Enzyme                  |
| Dynamin-2 (by homology)                                                 | P50570     | DNM2      | CHEMBL5812    | <div><div></div></div> | 0 / 1                  | Enzyme                  |
| Dynamin-3 (by homology)                                                 | Q9UQ16     | DNM3      |               | <div><div></div></div> | 0 / 1                  | Structural              |
| Carbonic anhydrase 1                                                    | P00915     | CA1       | CHEMBL261     | <div><div></div></div> | 0 / 3                  | Enzyme                  |
| Carbonic anhydrase 2                                                    | P00918     | CA2       | CHEMBL205     | <div><div></div></div> | 0 / 3                  | Enzyme                  |
| Alpha-trypsin chain 1                                                   | P07477     | PRSS1     | CHEMBL209     | <div><div></div></div> | 0 / 1                  | Serine Protease         |
| Carbonic anhydrase 4                                                    | P22748     | CA4       | CHEMBL3729    | <div><div></div></div> | 0 / 3                  | Enzyme                  |

# SwissTargetPrediction report:

## Reference:

Gfeller D., Michielin O. & Zoete V.  
Shaping the interaction landscape of  
bioactive molecules, *Bioinformatics*  
(2013) 29:3073-3079.

## Query Molecule

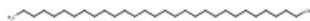

## Frequency of Target Class



| Target                                                                            | Uniprot ID                    | Gene code                    | ChEMBL ID     | Probability            | # sim. cmpds (3D / 2D) | Target Class    |
|-----------------------------------------------------------------------------------|-------------------------------|------------------------------|---------------|------------------------|------------------------|-----------------|
| Cocaine esterase                                                                  | <a href="#">Q00748</a>        | <a href="#">CES2</a>         | CHEMBL3180    | <div><div></div></div> | 0 / 6                  | Enzyme          |
| Liver carboxylesterase 1                                                          | <a href="#">P23141</a>        | <a href="#">CES1</a>         | CHEMBL2265    | <div><div></div></div> | 0 / 6                  | Enzyme          |
| Dynamin-1                                                                         | <a href="#">Q05193</a>        | <a href="#">DNM1</a>         | CHEMBL4958    | <div><div></div></div> | 0 / 1                  | Structural      |
| Tyrosyl-DNA phosphodiesterase 1                                                   | <a href="#">Q9NUW8</a>        | <a href="#">TDP1</a>         | CHEMBL1075138 | <div><div></div></div> | 0 / 1                  | Enzyme          |
| N-acyl ethanolamine-hydrolyzing acid amidase subunit alpha ( <i>by homology</i> ) | <a href="#">Q02083</a>        | <a href="#">NAAA</a>         | CHEMBL4349    | <div><div></div></div> | 0 / 1                  | Enzyme          |
| Carboxylesterase 5A ( <i>by homology</i> )                                        | <a href="#">Q6NT32</a>        | <a href="#">CES5A</a>        |               | <div><div></div></div> | 0 / 6                  | Enzyme          |
| Carboxylesterase 3 ( <i>by homology</i> )                                         | <a href="#">Q6UWW8</a>        | <a href="#">CES3</a>         |               | <div><div></div></div> | 0 / 6                  | Enzyme          |
| Dynamin-2 ( <i>by homology</i> )                                                  | <a href="#">P50570</a>        | <a href="#">DNM2</a>         | CHEMBL5812    | <div><div></div></div> | 0 / 1                  | Enzyme          |
| Dynamin-3 ( <i>by homology</i> )                                                  | <a href="#">Q9UQ16</a>        | <a href="#">DNM3</a>         |               | <div><div></div></div> | 0 / 1                  | Structural      |
| Carbonic anhydrase 1                                                              | <a href="#">P00915</a>        | <a href="#">CA1</a>          | CHEMBL261     | <div><div></div></div> | 0 / 3                  | Enzyme          |
| Carbonic anhydrase 2                                                              | <a href="#">P00918</a>        | <a href="#">CA2</a>          | CHEMBL205     | <div><div></div></div> | 0 / 3                  | Enzyme          |
| Alpha-trypsin chain 1                                                             | <a href="#">P07477</a>        | <a href="#">PRSS1</a>        | CHEMBL209     | <div><div></div></div> | 0 / 1                  | Serine Protease |
| Carbonic anhydrase 4                                                              | <a href="#">P22748</a>        | <a href="#">CA4</a>          | CHEMBL3729    | <div><div></div></div> | 0 / 3                  | Enzyme          |
| Glutamate receptor ionotropic, NMDA 1                                             | <a href="#">Q05586</a>        | <a href="#">GRIN1</a>        | CHEMBL2015    | <div><div></div></div> | 0 / 1                  | Ion channel     |
| Complex                                                                           | <a href="#">Q05586/Q12879</a> | <a href="#">GRIN1/GRIN2A</a> | CHEMBL1907604 | <div><div></div></div> | 0 / 1                  | Ion channel     |



# SwissTargetPrediction report:

## Reference:

Gfeller D., Michielin O. & Zoete V.  
Shaping the interaction landscape of  
bioactive molecules, *Bioinformatics*  
(2013) 29:3073-3079.

## Query Molecule

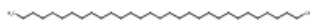

## Frequency of Target Class



| Target                                                                           | Uniprot ID                    | Gene code                    | ChEMBL ID     | Probability            | # sim. cmpds (3D / 2D) | Target Class    |
|----------------------------------------------------------------------------------|-------------------------------|------------------------------|---------------|------------------------|------------------------|-----------------|
| Cocaine esterase                                                                 | <a href="#">Q00748</a>        | <a href="#">CES2</a>         | CHEMBL3180    | <div><div></div></div> | 0 / 6                  | Enzyme          |
| Liver carboxylesterase 1                                                         | <a href="#">P23141</a>        | <a href="#">CES1</a>         | CHEMBL2265    | <div><div></div></div> | 0 / 6                  | Enzyme          |
| Dynamin-1                                                                        | <a href="#">Q05193</a>        | <a href="#">DNM1</a>         | CHEMBL4958    | <div><div></div></div> | 0 / 1                  | Structural      |
| Tyrosyl-DNA phosphodiesterase 1                                                  | <a href="#">Q9NUW8</a>        | <a href="#">TDP1</a>         | CHEMBL1075138 | <div><div></div></div> | 0 / 1                  | Enzyme          |
| N-acylethanolamine-hydrolyzing acid amidase subunit alpha ( <i>by homology</i> ) | <a href="#">Q02083</a>        | <a href="#">NAAA</a>         | CHEMBL4349    | <div><div></div></div> | 0 / 1                  | Enzyme          |
| Carboxylesterase 5A ( <i>by homology</i> )                                       | <a href="#">Q6NT32</a>        | <a href="#">CES5A</a>        |               | <div><div></div></div> | 0 / 6                  | Enzyme          |
| Carboxylesterase 3 ( <i>by homology</i> )                                        | <a href="#">Q6UWW8</a>        | <a href="#">CES3</a>         |               | <div><div></div></div> | 0 / 6                  | Enzyme          |
| Dynamin-2 ( <i>by homology</i> )                                                 | <a href="#">P50570</a>        | <a href="#">DNM2</a>         | CHEMBL5812    | <div><div></div></div> | 0 / 1                  | Enzyme          |
| Dynamin-3 ( <i>by homology</i> )                                                 | <a href="#">Q9UQ16</a>        | <a href="#">DNM3</a>         |               | <div><div></div></div> | 0 / 1                  | Structural      |
| Carbonic anhydrase 1                                                             | <a href="#">P00915</a>        | <a href="#">CA1</a>          | CHEMBL261     | <div><div></div></div> | 0 / 3                  | Enzyme          |
| Carbonic anhydrase 2                                                             | <a href="#">P00918</a>        | <a href="#">CA2</a>          | CHEMBL205     | <div><div></div></div> | 0 / 3                  | Enzyme          |
| Alpha-trypsin chain 1                                                            | <a href="#">P07477</a>        | <a href="#">PRSS1</a>        | CHEMBL209     | <div><div></div></div> | 0 / 1                  | Serine Protease |
| Carbonic anhydrase 4                                                             | <a href="#">P22748</a>        | <a href="#">CA4</a>          | CHEMBL3729    | <div><div></div></div> | 0 / 3                  | Enzyme          |
| Glutamate receptor ionotropic, NMDA 1                                            | <a href="#">Q05586</a>        | <a href="#">GRIN1</a>        | CHEMBL2015    | <div><div></div></div> | 0 / 1                  | Ion channel     |
| Complex                                                                          | <a href="#">Q05586/Q12879</a> | <a href="#">GRIN1/GRIN2A</a> | CHEMBL1907604 | <div><div></div></div> | 0 / 1                  | Ion channel     |

# SwissTargetPrediction report:

## Reference:

Gfeller D., Michielin O. & Zoete V.  
 Shaping the interaction landscape of  
 bioactive molecules, *Bioinformatics*  
 (2013) 29:3073-3079.

## Query Molecule

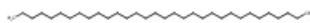

## Frequency of Target Class

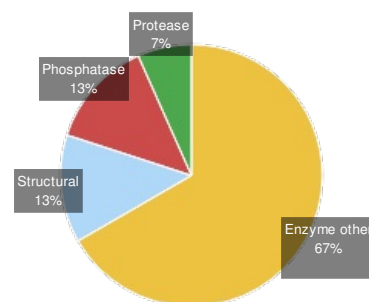

| Target                                                                  | Uniprot ID | Gene code | ChEMBL ID     | Probability            | # sim. cmpds (3D / 2D) | Target Class            |
|-------------------------------------------------------------------------|------------|-----------|---------------|------------------------|------------------------|-------------------------|
| Cocaine esterase                                                        | O00748     | CES2      | CHEMBL3180    | <div><div></div></div> | 0 / 6                  | Enzyme                  |
| Liver carboxylesterase 1                                                | P23141     | CES1      | CHEMBL2265    | <div><div></div></div> | 0 / 6                  | Enzyme                  |
| Dynamin-1                                                               | Q05193     | DNM1      | CHEMBL4958    | <div><div></div></div> | 0 / 1                  | Structural              |
| Tyrosyl-DNA phosphodiesterase 1                                         | Q9NUW8     | TDP1      | CHEMBL1075138 | <div><div></div></div> | 0 / 1                  | Enzyme                  |
| N-acylethanolamine-hydrolyzing acid amidase subunit alpha (by homology) | Q02083     | NAAA      | CHEMBL4349    | <div><div></div></div> | 0 / 1                  | Enzyme                  |
| Carboxylesterase 5A (by homology)                                       | Q6NT32     | CES5A     |               | <div><div></div></div> | 0 / 6                  | Enzyme                  |
| Carboxylesterase 3 (by homology)                                        | Q6UWW8     | CES3      |               | <div><div></div></div> | 0 / 6                  | Enzyme                  |
| Dynamin-2 (by homology)                                                 | P50570     | DNM2      | CHEMBL5812    | <div><div></div></div> | 0 / 1                  | Enzyme                  |
| Dynamin-3 (by homology)                                                 | Q9UQ16     | DNM3      |               | <div><div></div></div> | 0 / 1                  | Structural              |
| M-phase inducer phosphatase 1 (by homology)                             | P30304     | CDC25A    | CHEMBL3775    | <div><div></div></div> | 1 / 0                  | Ser_Thr_Tyr Phosphatase |
| M-phase inducer phosphatase 2 (by homology)                             | P30305     | CDC25B    | CHEMBL4804    | <div><div></div></div> | 1 / 0                  | Ser_Thr_Tyr Phosphatase |
| Carbonic anhydrase 1                                                    | P00915     | CA1       | CHEMBL261     | <div><div></div></div> | 0 / 3                  | Enzyme                  |
| Carbonic anhydrase 2                                                    | P00918     | CA2       | CHEMBL205     | <div><div></div></div> | 0 / 3                  | Enzyme                  |
| Alpha-trypsin chain 1                                                   | P07477     | PRSS1     | CHEMBL209     | <div><div></div></div> | 0 / 1                  | Serine Protease         |
| Carbonic anhydrase 4                                                    | P22748     | CA4       | CHEMBL3729    | <div><div></div></div> | 0 / 3                  | Enzyme                  |

# SwissTargetPrediction report:

## Reference:

Gfeller D., Michielin O. & Zoete V.  
Shaping the interaction landscape of  
bioactive molecules, *Bioinformatics*  
(2013) 29:3073-3079.

## Query Molecule

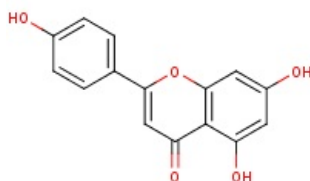

## Frequency of Target Class

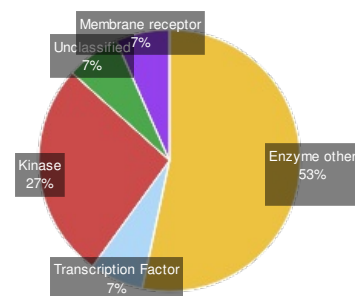

| Target                                                         | Uniprot ID | Gene code | ChEMBL ID     | Probability            | # sim. cmpds (3D / 2D) | Target Class         |
|----------------------------------------------------------------|------------|-----------|---------------|------------------------|------------------------|----------------------|
| Aldo-keto reductase family 1 member B10 ( <i>by homology</i> ) | P06218     | AKR1B10   | CHEMBL5983    | <div><div></div></div> | 21 / 67                | Enzyme               |
| Estrogen receptor                                              | P03372     | ESR1      | CHEMBL206     | <div><div></div></div> | 165 / 60               | Transcription Factor |
| Cytochrome P450 1A2 ( <i>by homology</i> )                     | P05177     | CYP1A2    | CHEMBL3356    | <div><div></div></div> | 7 / 13                 | Enzyme               |
| Cyclin-dependent kinase 1 ( <i>by homology</i> )               | P06493     | CDK1      | CHEMBL308     | <div><div></div></div> | 13 / 22                | Ser_Thr Kinase       |
| Microtubule-associated protein tau                             | P10636     | MAPT      | CHEMBL1293224 | <div><div></div></div> | 44 / 88                | Unclassified         |
| Cytochrome P450 19A1                                           | P11511     | CYP19A1   | CHEMBL1978    | <div><div></div></div> | 10 / 19                | Enzyme               |
| Cyclin-dependent kinase 4 ( <i>by homology</i> )               | P11802     | CDK4      | CHEMBL331     | <div><div></div></div> | 13 / 22                | Ser_Thr Kinase       |
| Estradiol 17-beta-dehydrogenase 1                              | P14061     | HSD17B1   | CHEMBL3181    | <div><div></div></div> | 87 / 4                 | Enzyme               |
| Aldose reductase ( <i>by homology</i> )                        | P15121     | AKR1B1    | CHEMBL1900    | <div><div></div></div> | 21 / 67                | Enzyme               |
| Casein kinase II subunit alpha' ( <i>by homology</i> )         | P19784     | CSNK2A2   | CHEMBL4070    | <div><div></div></div> | 3 / 2                  | Ser_Thr Kinase       |
| Amine oxidase [flavin-containing] A                            | P21397     | MAOA      | CHEMBL1951    | <div><div></div></div> | 8 / 45                 | Enzyme               |
| Prostaglandin G/H synthase 1 ( <i>by homology</i> )            | P23219     | PTGS1     | CHEMBL221     | <div><div></div></div> | 15 / 15                | Enzyme               |
| Cyclin-dependent kinase 2 ( <i>by homology</i> )               | P24941     | CDK2      | CHEMBL301     | <div><div></div></div> | 13 / 22                | Ser_Thr Kinase       |
| Amine oxidase [flavin-containing] B ( <i>by homology</i> )     | P27338     | MAOB      | CHEMBL2039    | <div><div></div></div> | 8 / 45                 | Enzyme               |
| Adenosine receptor A2a ( <i>by homology</i> )                  | P29274     | ADORA2A   | CHEMBL251     | <div><div></div></div> | 5 / 13                 | Membrane receptor    |

# SwissTargetPrediction report:

## Reference:

Gfeller D., Michielin O. & Zoete V.  
Shaping the interaction landscape of  
bioactive molecules, *Bioinformatics*  
(2013) 29:3073-3079.

## Query Molecule

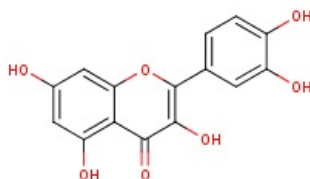

## Frequency of Target Class

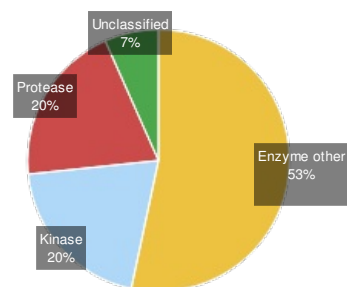

| Target                                                         | Uniprot ID | Gene code | ChEMBL ID     | Probability | # sim. cmpds (3D / 2D) | Target Class     |
|----------------------------------------------------------------|------------|-----------|---------------|-------------|------------------------|------------------|
| Carbonic anhydrase 12                                          | O43570     | CA12      | CHEMBL3242    | <div></div> | 3 / 5                  | Enzyme           |
| Epidermal growth factor receptor                               | P00533     | EGFR      | CHEMBL203     | <div></div> | 6 / 28                 | Tyr Kinase       |
| Carbonic anhydrase 1                                           | P00915     | CA1       | CHEMBL261     | <div></div> | 10 / 7                 | Enzyme           |
| Carbonic anhydrase 2                                           | P00918     | CA2       | CHEMBL205     | <div></div> | 10 / 7                 | Enzyme           |
| Phospholipase A2                                               | P04054     | PLA2G1B   | CHEMBL4426    | <div></div> | 1 / 1                  | Enzyme           |
| Receptor tyrosine-protein kinase erbB-2 ( <i>by homology</i> ) | P04626     | ERBB2     | CHEMBL1824    | <div></div> | 6 / 28                 | Tyr Kinase       |
| Myeloperoxidase                                                | P05164     | MPO       | CHEMBL2439    | <div></div> | 1 / 1                  | Enzyme           |
| Cytochrome P450 1A2 ( <i>by homology</i> )                     | P05177     | CYP1A2    | CHEMBL3356    | <div></div> | 8 / 13                 | Enzyme           |
| Cyclin-dependent kinase 1                                      | P06493     | CDK1      | CHEMBL308     | <div></div> | 3 / 27                 | Ser_Thr Kinase   |
| Carbonic anhydrase 3                                           | P07451     | CA3       | CHEMBL2885    | <div></div> | 10 / 7                 | Enzyme           |
| Alpha-trypsin chain 1                                          | P07477     | PRSS1     | CHEMBL209     | <div></div> | 1 / 2                  | Serine Protease  |
| PEX                                                            | P08253     | MMP2      | CHEMBL333     | <div></div> | 5 / 2                  | Metallo Protease |
| Stromelysin-1                                                  | P08254     | MMP3      | CHEMBL283     | <div></div> | 3 / 2                  | Metallo Protease |
| Arachidonate 5-lipoxygenase                                    | P09917     | ALOX5     | CHEMBL215     | <div></div> | 10 / 52                | Enzyme           |
| Microtubule-associated protein tau                             | P10636     | MAPT      | CHEMBL1293224 | <div></div> | 25 / 77                | Unclassified     |

# SwissTargetPrediction report:

## Reference:

Gfeller D., Michielin O. & Zoete V.  
*Shaping the interaction landscape of bioactive molecules, Bioinformatics*  
 (2013) 29:3073-3079.

## Query Molecule

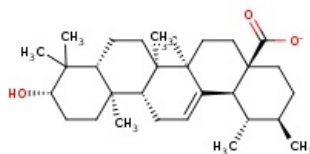

## Frequency of Target Class



| Target                                                            | Uniprot ID | Gene code | ChEMBL ID     | Probability            | # sim. cmpds (3D / 2D) | Target Class      |
|-------------------------------------------------------------------|------------|-----------|---------------|------------------------|------------------------|-------------------|
| DNA polymerase beta                                               | P06746     | POLB      | CHEMBL2392    | <div><div></div></div> | 6 / 19                 | Enzyme            |
| Tyrosine-protein phosphatase non-receptor type 2                  | P17706     | PTPN2     | CHEMBL3807    | <div><div></div></div> | 15 / 49                | Tyr Phosphatase   |
| Tyrosine-protein phosphatase non-receptor type 1                  | P18031     | PTPN1     | CHEMBL335     | <div><div></div></div> | 15 / 49                | Tyr Phosphatase   |
| Corticosteroid 11-beta-dehydrogenase isozyme 1                    | P28845     | HSD11B1   | CHEMBL4235    | <div><div></div></div> | 6 / 24                 | Enzyme            |
| Hydroxysteroid 11-beta-dehydrogenase 1-like protein (by homology) | Q7Z5J1     | HSD11B1L  |               | <div><div></div></div> | 6 / 24                 | Enzyme            |
| Aldo-keto reductase family 1 member B10                           | O60218     | AKR1B10   | CHEMBL5983    | <div><div></div></div> | 4 / 7                  | Enzyme            |
| Aldose reductase (by homology)                                    | P15121     | AKR1B1    | CHEMBL1900    | <div><div></div></div> | 4 / 7                  | Enzyme            |
| Aldo-keto reductase family 1 member B15 (by homology)             | C9JRZ8     | AKR1B15   |               | <div><div></div></div> | 4 / 7                  | Enzyme            |
| Alcohol dehydrogenase [NADP(+)] (by homology)                     | P14550     | AKR1A1    | CHEMBL2246    | <div><div></div></div> | 4 / 7                  | Enzyme            |
| 1,5-anhydro-D-fructose reductase (by homology)                    | Q96JD6     | AKR1E2    |               | <div><div></div></div> | 4 / 7                  | Enzyme            |
| Phospholipase A2                                                  | P04054     | PLA2G1B   | CHEMBL4426    | <div><div></div></div> | 2 / 1                  | Enzyme            |
| Microtubule-associated protein tau                                | P10636     | MAPT      | CHEMBL1293224 | <div><div></div></div> | 9 / 20                 | Unclassified      |
| Receptor-type tyrosine-protein phosphatase F                      | P10586     | PTPRF     | CHEMBL3521    | <div><div></div></div> | 1 / 1                  | Membrane receptor |
| Low molecular weight phosphotyrosine protein phosphatase          | P24666     | ACP1      | CHEMBL4903    | <div><div></div></div> | 1 / 1                  | Tyr Phosphatase   |
| Receptor-type tyrosine-protein phosphatase delta (by homology)    | P23468     | PTPRD     |               | <div><div></div></div> | 1 / 1                  | Membrane receptor |

# SwissTargetPrediction report:

## Reference:

Gfeller D., Michielin O. & Zoete V.  
Shaping the interaction landscape of  
bioactive molecules, *Bioinformatics*  
(2013) 29:3073-3079.

## Query Molecule

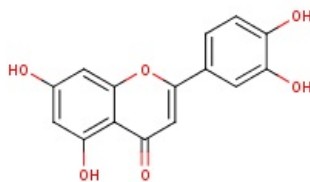

## Frequency of Target Class

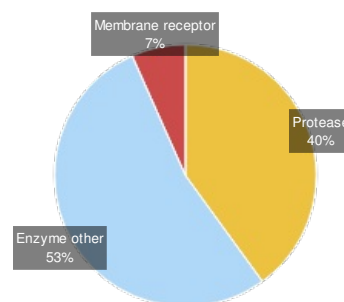

| Target                                                     | Uniprot ID | Gene code | ChEMBL ID  | Probability            | # sim. cmpds (3D / 2D) | Target Class      |
|------------------------------------------------------------|------------|-----------|------------|------------------------|------------------------|-------------------|
| 22 kDa interstitial collagenase ( <i>by homology</i> )     | P03956     | MMP1      | CHEMBL332  | <div><div></div></div> | 4 / 2                  | Metallo Protease  |
| Cytochrome P450 1A2 ( <i>by homology</i> )                 | P05177     | CYP1A2    | CHEMBL3356 | <div><div></div></div> | 9 / 13                 | Enzyme            |
| PEX                                                        | P08253     | MMP2      | CHEMBL333  | <div><div></div></div> | 4 / 2                  | Metallo Protease  |
| Stromelysin-1 ( <i>by homology</i> )                       | P08254     | MMP3      | CHEMBL283  | <div><div></div></div> | 4 / 2                  | Metallo Protease  |
| 67 kDa matrix metalloproteinase-9                          | P14780     | MMP9      | CHEMBL321  | <div><div></div></div> | 4 / 2                  | Metallo Protease  |
| Aldose reductase ( <i>by homology</i> )                    | P15121     | AKR1B1    | CHEMBL1900 | <div><div></div></div> | 19 / 68                | Enzyme            |
| Amine oxidase [flavin-containing] A                        | P21397     | MAOA      | CHEMBL1951 | <div><div></div></div> | 7 / 31                 | Enzyme            |
| Amine oxidase [flavin-containing] B ( <i>by homology</i> ) | P27338     | MAOB      | CHEMBL2039 | <div><div></div></div> | 7 / 31                 | Enzyme            |
| ADP-ribosyl cyclase 1                                      | P28907     | CD38      | CHEMBL4660 | <div><div></div></div> | 1 / 2                  | Enzyme            |
| Adenosine receptor A1 ( <i>by homology</i> )               | P30542     | ADORA1    | CHEMBL226  | <div><div></div></div> | 5 / 23                 | Membrane receptor |
| Macrophage metalloelastase                                 | P39900     | MMP12     | CHEMBL4393 | <div><div></div></div> | 4 / 2                  | Metallo Protease  |
| Collagenase 3 ( <i>by homology</i> )                       | P45452     | MMP13     | CHEMBL280  | <div><div></div></div> | 4 / 2                  | Metallo Protease  |
| Xanthine dehydrogenase/oxidase                             | P47989     | XDH       | CHEMBL1929 | <div><div></div></div> | 8 / 14                 | Enzyme            |
| Lactoylglutathione lyase                                   | Q04760     | GLO1      | CHEMBL2424 | <div><div></div></div> | 3 / 4                  | Enzyme            |
| Lysine-tRNA ligase                                         | Q15046     | KARS      | CHEMBL5575 | <div><div></div></div> | 4 / 3                  | Enzyme            |

# SwissTargetPrediction report:

## Reference:

Gfeller D., Michielin O. & Zoete V.  
**Shaping the interaction landscape of bioactive molecules**, *Bioinformatics* (2013) 29:3073-3079.

## Query Molecule

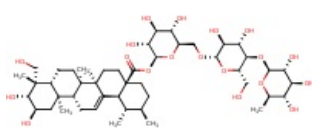

## Frequency of Target Class

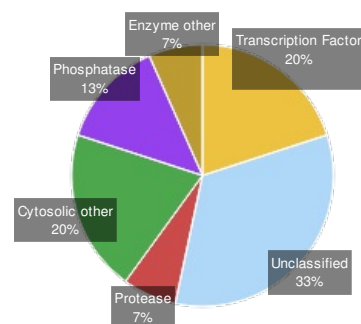

| Target                                                                               | Uniprot ID | Gene code | ChEMBL ID     | Probability            | # sim. cmpds (3D / 2D) | Target Class         |
|--------------------------------------------------------------------------------------|------------|-----------|---------------|------------------------|------------------------|----------------------|
| Signal transducer and activator of transcription 3                                   | P40763     | STAT3     | CHEMBL4026    | <div><div></div></div> | 1 / 4                  | Transcription Factor |
| Signal transducer and activator of transcription 1-alpha/beta ( <i>by homology</i> ) | P42224     | STAT1     | CHEMBL6101    | <div><div></div></div> | 1 / 4                  | Unclassified         |
| Signal transducer and activator of transcription 2 ( <i>by homology</i> )            | P52630     | STAT2     |               | <div><div></div></div> | 1 / 4                  | Transcription Factor |
| Signal transducer and activator of transcription 4 ( <i>by homology</i> )            | Q14765     | STAT4     |               | <div><div></div></div> | 1 / 4                  | Transcription Factor |
| Activation peptide fragment 1                                                        | P00734     | F2        | CHEMBL204     | <div><div></div></div> | 1 / 10                 | Serine Protease      |
| Bcl-2-like protein 1                                                                 | Q07817     | BCL2L1    | CHEMBL4625    | <div><div></div></div> | 0 / 3                  | Cytosolic other      |
| Apoptosis regulator Bcl-2 ( <i>by homology</i> )                                     | P10415     | BCL2      | CHEMBL4860    | <div><div></div></div> | 0 / 3                  | Cytosolic other      |
| Bcl-2-like protein 2 ( <i>by homology</i> )                                          | Q92843     | BCL2L2    | CHEMBL4677    | <div><div></div></div> | 0 / 3                  | Cytosolic other      |
| Microtubule-associated protein tau                                                   | P10636     | MAPT      | CHEMBL1293224 | <div><div></div></div> | 3 / 24                 | Unclassified         |
| Tyrosine-protein phosphatase non-receptor type 2                                     | P17706     | PTPN2     | CHEMBL3807    | <div><div></div></div> | 12 / 35                | Tyr Phosphatase      |
| Tyrosine-protein phosphatase non-receptor type 1                                     | P18031     | PTPN1     | CHEMBL335     | <div><div></div></div> | 12 / 35                | Tyr Phosphatase      |
| 3-hydroxy-3-methylglutaryl-coenzyme A reductase                                      | P04035     | HMGCR     | CHEMBL402     | <div><div></div></div> | 2 / 83                 | Enzyme               |
| Muscleblind-like protein 1                                                           | Q9NR56     | MBNL1     | CHEMBL1293317 | <div><div></div></div> | 2 / 4                  | Unclassified         |
| Muscleblind-like protein 2 ( <i>by homology</i> )                                    | Q5VZF2     | MBNL2     |               | <div><div></div></div> | 2 / 4                  | Unclassified         |
| Muscleblind-like protein 3 ( <i>by homology</i> )                                    | Q9NUK0     | MBNL3     |               | <div><div></div></div> | 2 / 4                  | Unclassified         |

# SwissTargetPrediction report:

## Reference:

Gfeller D., Michielin O. & Zoete V.  
Shaping the interaction landscape of bioactive molecules, *Bioinformatics* (2013) 29:3073-3079.

## Query Molecule



## Frequency of Target Class



| Target                                             | Uniprot ID | Gene code | ChEMBL ID     | Probability            | # sim. cmpds (3D / 2D) | Target Class |
|----------------------------------------------------|------------|-----------|---------------|------------------------|------------------------|--------------|
| Fibroblast growth factor 1                         | P05230     | FGF1      | CHEMBL2120    | <div><div></div></div> | 0 / 12                 | Secreted     |
| Fibroblast growth factor 2                         | P09038     | FGF2      | CHEMBL3107    | <div><div></div></div> | 0 / 12                 | Secreted     |
| Heparanase 8 kDa subunit                           | Q9Y251     | HPSE      | CHEMBL3921    | <div><div></div></div> | 0 / 7                  | Enzyme       |
| Inactive heparanase-2 (by homology)                | Q8WWQ2     | HPSE2     |               | <div><div></div></div> | 0 / 7                  | Enzyme       |
| Carbonic anhydrase 1                               | P00915     | CA1       | CHEMBL261     | <div><div></div></div> | 1 / 21                 | Enzyme       |
| Carbonic anhydrase 2                               | P00918     | CA2       | CHEMBL205     | <div><div></div></div> | 1 / 21                 | Enzyme       |
| Carbonic anhydrase 5A, mitochondrial (by homology) | P35218     | CA5A      | CHEMBL4789    | <div><div></div></div> | 1 / 21                 | Enzyme       |
| Carbonic anhydrase 7 (by homology)                 | P43166     | CA7       | CHEMBL2326    | <div><div></div></div> | 1 / 21                 | Enzyme       |
| Carbonic anhydrase 13 (by homology)                | Q8N1Q1     | CA13      | CHEMBL3912    | <div><div></div></div> | 1 / 21                 | Enzyme       |
| Carbonic anhydrase 5B, mitochondrial (by homology) | Q9Y2D0     | CA5B      | CHEMBL3969    | <div><div></div></div> | 1 / 21                 | Enzyme       |
| Carbonic anhydrase 3 (by homology)                 | P07451     | CA3       | CHEMBL2885    | <div><div></div></div> | 1 / 21                 | Enzyme       |
| Carbonic anhydrase 4                               | P22748     | CA4       | CHEMBL3729    | <div><div></div></div> | 1 / 1                  | Enzyme       |
| Ras-related protein Rap-1A                         | P62834     | RAP1A     | CHEMBL1255139 | <div><div></div></div> | 0 / 1                  | Unclassified |
| cAMP-specific 3',5'-cyclic phosphodiesterase 4D    | Q08499     | PDE4D     | CHEMBL288     | <div><div></div></div> | 0 / 1                  | Enzyme       |
| Ras-related protein Rap-1b (by homology)           | P61224     | RAP1B     |               | <div><div></div></div> | 0 / 1                  | Unclassified |



# SwissTargetPrediction report:

## Reference:

Gfeller D., Michielin O. & Zoete V.  
Shaping the interaction landscape of  
bioactive molecules, *Bioinformatics*  
(2013) 29:3073-3079.

## Query Molecule

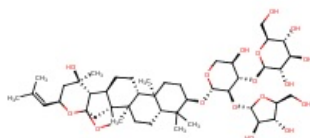

## Frequency of Target Class

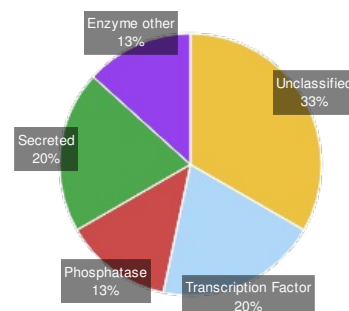

| Target                                                                      | Uniprot ID | Gene code | ChEMBL ID     | Probability            | # sim. cmpds (3D / 2D) | Target Class         |
|-----------------------------------------------------------------------------|------------|-----------|---------------|------------------------|------------------------|----------------------|
| Microtubule-associated protein tau                                          | P10636     | MAPT      | CHEMBL1293224 | <div><div></div></div> | 1 / 12                 | Unclassified         |
| Signal transducer and activator of transcription 3                          | P40763     | STAT3     | CHEMBL4026    | <div><div></div></div> | 2 / 4                  | Transcription Factor |
| Signal transducer and activator of transcription 1-alpha/beta (by homology) | P42224     | STAT1     | CHEMBL6101    | <div><div></div></div> | 2 / 4                  | Unclassified         |
| Signal transducer and activator of transcription 2 (by homology)            | P52630     | STAT2     |               | <div><div></div></div> | 2 / 4                  | Transcription Factor |
| Signal transducer and activator of transcription 4 (by homology)            | Q14765     | STAT4     |               | <div><div></div></div> | 2 / 4                  | Transcription Factor |
| Muscleblind-like protein 1                                                  | Q9NR56     | MBNL1     | CHEMBL1293317 | <div><div></div></div> | 0 / 2                  | Unclassified         |
| Muscleblind-like protein 2 (by homology)                                    | Q5VZF2     | MBNL2     |               | <div><div></div></div> | 0 / 2                  | Unclassified         |
| Muscleblind-like protein 3 (by homology)                                    | Q9NUK0     | MBNL3     |               | <div><div></div></div> | 0 / 2                  | Unclassified         |
| Tyrosine-protein phosphatase non-receptor type 1                            | P18031     | PTPN1     | CHEMBL335     | <div><div></div></div> | 4 / 6                  | Tyr Phosphatase      |
| Tyrosine-protein phosphatase non-receptor type 2 (by homology)              | P17706     | PTPN2     | CHEMBL3807    | <div><div></div></div> | 4 / 6                  | Tyr Phosphatase      |
| Fibroblast growth factor 1                                                  | P05230     | FGF1      | CHEMBL2120    | <div><div></div></div> | 1 / 6                  | Secreted             |
| Fibroblast growth factor 2                                                  | P09038     | FGF2      | CHEMBL3107    | <div><div></div></div> | 1 / 6                  | Secreted             |
| Vascular endothelial growth factor A                                        | P15692     | VEGFA     | CHEMBL1783    | <div><div></div></div> | 1 / 2                  | Secreted             |
| Heparanase 8 kDa subunit                                                    | Q9Y251     | HPSE      | CHEMBL3921    | <div><div></div></div> | 1 / 3                  | Enzyme               |
| Inactive heparanase-2 (by homology)                                         | Q8WWQ2     | HPSE2     |               | <div><div></div></div> | 1 / 3                  | Enzyme               |
